# Supplementary material for: Targeting macrophage TFEB-14-3-3 epsilon Interface by naringenin inhibits abdominal aortic aneurysm
Source: PubMed Central journal article supplement (PMC8885854; doi:10.1038/s41421-021-00363-1), 2022-03-01
Supplement: 41421_2021_363_MOESM1_ESM.pdf [file 41421_2021_363_MOESM1_ESM.pdf]

## Supplementary Figure Legends

1  
2 **Supplementary Fig. S1.** (a) Representative *in situ* zymography photography and quantification  
3 analysis of the infrarenal aortas of C57BL/6J mice. n=3 for each group. The data were analyzed  
4 using two-way ANOVA followed by Bonferroni test for post hoc comparison and are presented  
5 as the mean  $\pm$  SEM of three independent experiments. \* $P$ <0.05. Scale bar = 50  $\mu$ m. (b)  
6 Representative *ex vivo* gelatin zymography of infrarenal aortas of the mice with CaPO<sub>4</sub>-induced  
7 AAA. n=3 mice for each group. (c) The mRNA levels of MMP-2 and MMP-9 in the abdominal  
8 aorta of the mice with CaPO<sub>4</sub>-induced AAA. The data were analyzed using two-way ANOVA  
9 followed by Bonferroni test for post hoc comparison and are presented as the mean  $\pm$  SEM of  
10 four independent experiments. \* $P$ <0.05. (d) Quantification of the positive immunofluorescence  
11 staining area of leukocytes (CD45 positive) and macrophages (Mac-3 positive) in the adventitia  
12 of the infrarenal aortas of the mice with CaPO<sub>4</sub>-induced AAA. The data were analyzed using  
13 two-way ANOVA followed by Bonferroni test for post hoc comparison and are presented as the  
14 mean  $\pm$  SEM of five independent experiments. \* $P$ <0.05. (e) Representative  
15 immunofluorescence (red) TUNEL staining of apoptotic cells and quantification of the number  
16 of TUNEL-positive cells per mm<sup>2</sup> area of infrarenal arteries in the mice with CaPO<sub>4</sub>-induced  
17 AAA. Nuclei were stained with Hoechst (blue). The merged are (arrow) indicates the apoptotic  
18 cells. The data were analyzed using two-way ANOVA followed by Bonferroni test for post hoc  
19 comparison and are presented as the mean  $\pm$  SEM of five independent experiments. \* $P$ <0.05.  
20 Scale bar = 50  $\mu$ m. (f) Western blotting analysis and quantification of the protein levels of  
21 cleaved caspase-3 and Bax in the abdominal aorta of the mice with CaPO<sub>4</sub>-induced AAA. The  
22 data were analyzed using two-way ANOVA followed by Bonferroni test for post hoc

1 comparison and are presented as the mean  $\pm$  SEM of six independent experiments. \* $P$ <0.05.  
2 NS, no significance. (g) Representative elastin Van Gieson staining and quantification of the  
3 infrarenal abdominal aortas of the mice with CaPO<sub>4</sub>-induced AAA. The data were analyzed  
4 using two-way ANOVA followed by Bonferroni test for post hoc comparison and are presented  
5 as the mean  $\pm$  SEM. n=5-8 for each group. (h) Quantification of *in situ* zymography  
6 photography of the infrarenal aortas of the mice with AngII-induced AAA with vehicle or  
7 naringenin (50 mg/kg/day) gavage. The data were analyzed using unpaired two-tailed Student's  
8 *t*-test. n=3 for each group. (i) Representative *ex vivo* gelatin zymography of the infrarenal aortas  
9 of the mice with AngII-induced AAA. n=3 mice for each group. (j) Representative image and  
10 quantification of the positive immunofluorescence staining area of leukocytes (CD45 positive)  
11 and macrophages (Mac-3 positive) in the abdominal aortas of the mice with AngII-induced  
12 AAA. The data were analyzed using unpaired two-tailed Student's *t*-test. n=3 for each group.  
13 \* $P$ <0.05. (k) ELISAs of IL-6, MCP-1, IL-10, TNF- $\alpha$  and IFN- $\gamma$  in the plasma of the AngII-  
14 induced mice with AAA. The data were analyzed using unpaired *t*-tests and are presented as  
15 the mean  $\pm$  SEM. n=6 for each group. \* $P$ <0.05. (l) Representative elastin Van Gieson staining  
16 of the infrarenal abdominal aortas of the mice with AngII-induced AAA treated with water or  
17 naringenin (50 mg/kg/day) gavage.

18

19 **Supplementary Fig. S2.** (a) Heatmap of naringenin-induced genes related to lysosomes  
20 according to the CMap database. (b) Lysosomal number analysis of primary rat vascular smooth  
21 muscle cells (left) and HUVECs (right) stimulated with naringenin (0, 50, 100, 200  $\mu$ M) for 12  
22 h or EBSS-induced starvation for 30 min. The data were analyzed using one-way ANOVA

1 followed by Bonferroni test for post hoc comparison and are presented as the mean  $\pm$  SEM of  
2 six independent experiments. \* $P$ <0.05. (c) DQ-red-BSA analysis of primary rat vascular  
3 smooth muscle cells (left) and HUVECs (right) stimulated with naringenin (0, 50, 100, 200  $\mu$ M)  
4 for 12 h or CQ (1  $\mu$ M) for 3 h. The data were analyzed using one-way ANOVA followed by  
5 Bonferroni test for post hoc comparison and are presented as the mean  $\pm$  SEM of six  
6 independent experiments. \* $P$ <0.05. (d) KEGG analysis of mRNA expression that was  
7 upregulated by naringenin in the RNA-seq analysis. The X axis represents the  $-\log_{10}$  ( $p$ -value).  
8 (e) RT-qPCR validation of lysosomal genes (ATP6V1A, NPC1, CTSS, etc.) in macrophages  
9 stimulated with vehicle or naringenin (200  $\mu$ M) for 12 h. The data were analyzed using two-  
10 way ANOVA followed by Bonferroni test for post hoc comparison and are presented as the  
11 mean  $\pm$  SEM of six independent experiments. \* $P$ <0.05. (f) 12-week-old male C57BL/6J mice  
12 were periadventitally treated with CaPO<sub>4</sub> and supplemented with vehicle or naringenin (50  
13 mg/kg/day) for 7 days, and the abdominal aorta was separated and digested into single cells.  
14 Flow cell sorting was performed to isolate CD31-positive endothelial cells for lysosomal  
15 number analysis. n=10-15 mice for each group in each experiment. The data were analyzed  
16 using two-way ANOVA followed by Bonferroni test for post hoc comparison and are presented  
17 as the mean  $\pm$  SEM of three independent experiments. \* $P$ <0.05. (g) RT-qPCR validation of  
18 TFE3, MiTF and Zkscan3 in macrophages stimulated with naringenin (0, 50, 100, 200  $\mu$ M) for  
19 12 h. The data were analyzed using one-way ANOVA followed by Bonferroni test for post hoc  
20 comparison and are presented as the mean  $\pm$  SEM of six independent experiments. \* $P$ <0.05. (h)  
21 Western blotting analysis and quantification of the protein levels of p-PKC and p-Akt in the  
22 vehicle- or naringenin (0, 100, 200  $\mu$ M for 12 hours)-treated BMDMs. The data were analyzed

1 using one-way ANOVA followed by Bonferroni test for post hoc comparison and are presented  
2 as the mean  $\pm$  SEM of six independent experiments. (i) Primary peritoneal TSC1<sup>flox/flox</sup>  
3 macrophages that transfected with Ad-GFP (10 MOI) (here as WT macrophages) or with Ad-  
4 Cre (10 MOI) (here as TSC1<sup>-/-</sup> macrophages) for 48 hours, then treated with naringenin (0  $\mu$ M,  
5 100  $\mu$ M, 200  $\mu$ M) for another 12 hours followed by Western blot analysis and quantification of  
6 the protein levels of TSC1 and mTORC1 downstream phospho-S6 as well as phospho-4EBP1.  
7 The data were analyzed using two-way ANOVA followed by Bonferroni test for post hoc  
8 comparison and are presented as the mean  $\pm$  SEM of six independent experiments. \**P*<0.05. (j)  
9 WT macrophages and TSC1<sup>-/-</sup> macrophages were treated with or without 200  $\mu$ M naringenin  
10 for 12 hours, then followed by LysoTracker Red staining for 30 mins and analyzed by flow  
11 cytometry. The data were analyzed using two-way ANOVA followed by Bonferroni test for post  
12 hoc comparison and are presented as the mean  $\pm$  SEM of six independent experiments. \**P*<0.05.  
13 (k) WT macrophages and TSC1<sup>-/-</sup> macrophages were treated with or without 200  $\mu$ M naringenin  
14 for 12 hours, then followed by DQ-Red-BSA incubation for 30 mins and analyzed by live cell  
15 confocal microscopy. Scale bar = 10  $\mu$ m. (l) RT-qPCR analysis of LAMP1, ATP6V1A, NPC1,  
16 NPC2 and CTSB expression in WT macrophages and TSC1<sup>-/-</sup> macrophages underwent  
17 naringenin treatment (200  $\mu$ M, 12 hours). The data were analyzed using two-way ANOVA  
18 followed by Bonferroni test for post hoc comparison and are presented as the mean  $\pm$  SEM of  
19 six independent experiments. \**P*<0.05. (m) Primary peritoneal macrophages that transfected  
20 with scrambled siRNA (50 nM) or TSC2 siRNA (50 nM) for 48 hours, then treated with  
21 naringenin (0  $\mu$ M, 100  $\mu$ M, 200  $\mu$ M) for another 12 hours followed by Western blot analysis  
22 and quantification of the protein levels of TSC2 and mTORC1 downstream phospho-S6 as well

1 as phospho-4EBP1. The data were analyzed using two-way ANOVA followed by Bonferroni  
2 test for post hoc comparison and are presented as the mean  $\pm$  SEM of six independent  
3 experiments. \* $P$ <0.05. (n) Primary peritoneal macrophages that transfected with scrambled  
4 siRNA (50 nM) or TSC2 siRNA (50 nM) for 48 hours, then treated with naringenin (200  $\mu$ M)  
5 for another 12 hours followed by LysoTracker Red staining for 30 mins and analyzed by flow  
6 cytometry. The data were analyzed using two-way ANOVA followed by Bonferroni test for post  
7 hoc comparison and are presented as the mean  $\pm$  SEM of six independent experiments. \* $P$ <0.05.  
8 (o) Primary peritoneal macrophages that transfected with scrambled siRNA (50 nM) or TSC2  
9 siRNA (50 nM) for 48 hours, then treated with naringenin (200  $\mu$ M) for another 12 hours  
10 followed by DQ-Red-BSA incubation for 30 mins and analyzed by live cell confocal  
11 microscopy. Scale bar = 10  $\mu$ m. (p) RT-qPCR analysis of TSC2, LAMP1, NPC1 and NPC2  
12 expression in scrambled siRNA transfected or TSC2 siRNA transfected macrophages  
13 underwent naringenin treatment (200  $\mu$ M, 12 hours). The data were analyzed using two-way  
14 ANOVA followed by Bonferroni test for post hoc comparison and are presented as the mean  $\pm$   
15 SEM of six independent experiments. \* $P$ <0.05. (q) Upper, Representative flow cytometry  
16 results of macrophages in abdominal aortic single cells digested from CaPO<sub>4</sub> treated 10-week-  
17 old C57BL/6J mice with water or naringenin (50 mg/kg/day) gavage (10 mice per group) for 7  
18 days. Lower, RT-qPCR analysis and quantification of TFEB and target genes (ATP6V1A, NPC2,  
19 LAMP1) in aortic macrophages sorted from abdominal aortic tissues of CaPO<sub>4</sub> treated 10-  
20 week-old C57BL/6J mice with water or naringenin (50 mg/kg/day) gavage (10 mice per group)  
21 for 7 days. The data were analyzed using unpaired two-tailed Student's *t*-test and are presented  
22 as the mean  $\pm$  SEM of six independent experiments. \* $P$ <0.05. (r) Representative

1 immunofluorescence images of IgG staining in human aneurysmal abdominal aortas and non-  
2 aneurysmal abdominal aortas.

3

4 **Supplementary Fig. S3.** (a) Schematic view of the generation of TFEB<sup>lox/lox</sup> mice. (b)

5 Genotyping of the TFEB macrophage-specific knockout mice by PCR analysis. (c) Western

6 blotting analysis of TFEB in the liver, heart, brain, aorta and macrophages from the TFEB<sup>lox/lox</sup>

7 and macrophage TFEB knockout mice (4 months, male; n=5 mice per genotype). The data were

8 analyzed using two-way ANOVA followed by Bonferroni test for post hoc comparison and are

9 presented as the mean  $\pm$  SEM. \* $P$ <0.05. (d) RT-qPCR analysis of TFEB levels in the peritoneal

10 macrophages isolated from mice injected with AAV2-GFP ( $1 \times 10^{11}$  genomic copies per mouse)

11 or AAV2-TFEB ( $1 \times 10^{11}$  genomic copies per mouse) at day 7. The data were analyzed using

12 unpaired two-tailed Student's  $t$ -test and are presented as the mean  $\pm$  SEM. n=3 for each group.

13 \* $P$ <0.05. (e) Representative photography (left) and maximal infrarenal abdominal aortic

14 diameter quantification (right) of the macroscopic features of CaPO<sub>4</sub>-induced aneurysms. 12-

15 week-old male C57BL/6J mice injected with AAV2-GFP ( $1 \times 10^{11}$  genomic copies per mouse)

16 or AAV2-TFEB ( $1 \times 10^{11}$  genomic copies per mouse) were periadventitially treated with CaPO<sub>4</sub>

17 for 7 days. n=9-10 for each group. The data were analyzed using unpaired two-tailed Student's

18  $t$ -test and are presented as the mean  $\pm$  SEM. \* $P$ <0.05. (f) Representative elastin Van Gieson

19 staining and elastin grade quantification of the infrarenal abdominal aortas in panel D. The data

20 were analysis by nonparemetric Kruskal-wallis test with a dumn post hoc test. (g)

21 Quantification of the maximal abdominal aortic diameter of the macrophage TFEB knockout

22 mice with CaPO<sub>4</sub>-induced AAA before treated by water or naringenin gavage. The data were

1 analyzed using unpaired *t*-tests and are presented as the mean  $\pm$  SEM. n=4-5 for each group, ns,  
2 no significance.

3

4 **Supplementary Fig. S4.** (a) Lysates of the primary peritoneal macrophages treated with vehicle  
5 or naringenin (200  $\mu$ M, 12 h) were immunoprecipitated with anti-FOXO4 antibody, and the  
6 precipitates were analyzed by immunoblotting with anti-14-3-3 $\epsilon$  antibody. (b) Diagrammatic  
7 view of the incorrectly digested peptide of 14-3-3 $\epsilon$  (from E162 to R171) upon naringenin  
8 incubation. Red arrows indicate the cleavage sites of trypsin. The blue arrow indicates the  
9 missed cleavage site of proteinase K. (c) Titration of p-TFEB peptide (LVGVTSSpSCPADLTQ)  
10 and p-control peptide (MARSHpSYPAKKK) with 14-3-3 $\epsilon$ . The probe concentration was 10  
11 nM in 5% DMSO (v/v). Data are presented as the mean  $\pm$  SEM of three independent  
12 experiments. (d) Results of the competitive binding assay for naringenin of p-control peptide  
13 (MARSHpSYPAKKK) and 14-3-3 $\epsilon$ . The peptide concentration was 5 nM, and the  
14 concentration of 14-3-3 $\epsilon$  was 10 nM. Data are presented as the mean  $\pm$  SEM of three  
15 independent experiments. (e) Nuclear-cytoplasmic separation followed by Western blot  
16 analysis of scrambled siRNA- or 14-3-3 epsilon siRNA (50 nM, 48 hours)-transfected primary  
17 peritoneal macrophages. The data were analyzed using two-way ANOVA followed by  
18 Bonferroni test for post hoc comparison and are presented as the mean  $\pm$  SEM of six  
19 independent experiments. \**P*<0.05. (f) Primary peritoneal macrophages were transfected with  
20 scrambled siRNA (50 nM) or 14-3-3 epsilon siRNA (50 nM) for 48 hours then followed by  
21 Lysotracker Red staining for 30 mins and analyzed by flow cytometry. The data were analyzed  
22 using unpaired two-tailed Student's *t*-test and are presented as the mean  $\pm$  SEM of four

1 independent experiments. \* $P < 0.05$ . The cells treated same with (f) were incubated with  
2 LysoTracker Green (g) or DQ-Red BSA (h) for 30 mins and then analyzed by live cell confocal  
3 microscopy. Scale bar = 10  $\mu\text{m}$ .

4  
5 **Supplementary Fig. S5.** (a) Representative image (upper) and quantification (lower) of the  
6 number of myeloid cells (Ly6C<sup>+</sup>/CD45<sup>+</sup> in bone marrow) by using flow cytometric assays.  
7 The data were analyzed using unpaired two-tailed Student's *t*-test and are presented as the mean  
8  $\pm$  SEM. N=3-5 for each group. (b) Representative image (upper) and quantification (lower) of  
9 the number of monocytes (Ly6C<sup>high</sup> in CD45<sup>+</sup>CD11b<sup>+</sup>Ly6G<sup>-</sup> blood cells) by using flow  
10 cytometric assays. The data were analyzed using unpaired two-tailed Student's *t*-test and are  
11 presented as the mean  $\pm$  SEM. n=3-5 for each group. (c) RT-qPCR validation of IL-1 $\beta$ , TNF- $\alpha$ ,  
12 iNOS and MCP1 in the wild-type (WT, TFEB<sup>fllox/fllox</sup> macrophages infected with Ad-GFP), TFEB  
13 knockout (TFEB KO, TFEB<sup>fllox/fllox</sup> macrophages infected with Ad-Cre) and TFEB-  
14 overexpressing (TFEB OE, TFEB<sup>fllox/fllox</sup> macrophages infected with Ad-TFEB) macrophages  
15 treated with vehicle or LPS (10 ng/ml, 12 h). The data were analyzed using two-way ANOVA  
16 followed by Bonferroni test for post hoc comparison and are presented as the mean  $\pm$  SEM of  
17 six independent experiments. \* $P < 0.05$ . (d) RT-qPCR validation of IRF9, KLF6, IRF5, RBP-J  
18 and STAT1 in the wild-type (WT) and TFEB knockout (TFEB KO) macrophages. The data  
19 were analyzed using unpaired two-tailed Student's *t*-test and are presented as the mean  $\pm$  SEM  
20 of six independent experiments. \* $P < 0.05$ . (e) RT-qPCR validation of KLF4, KLF2, EGR2,  
21 CMAF and STAT3 in the wild-type (WT) and TFEB knockout (TFEB KO) macrophages. The  
22 data were analyzed using unpaired two-tailed Student's *t*-test and are presented as the mean  $\pm$



- 1 SEM of six independent experiments. \* $P < 0.05$ . (f) RT-qPCR validation of KLF4, KLF2, EGR2,
- 2 CMAF and STAT3 in the wild-type (WT) and TFEB-overexpressing (TFEB OE) macrophages.
- 3 The data were analyzed using unpaired two-tailed Student's  $t$ -test and are presented as the mean
- 4  $\pm$  SEM of six independent experiments. \* $P < 0.05$ .

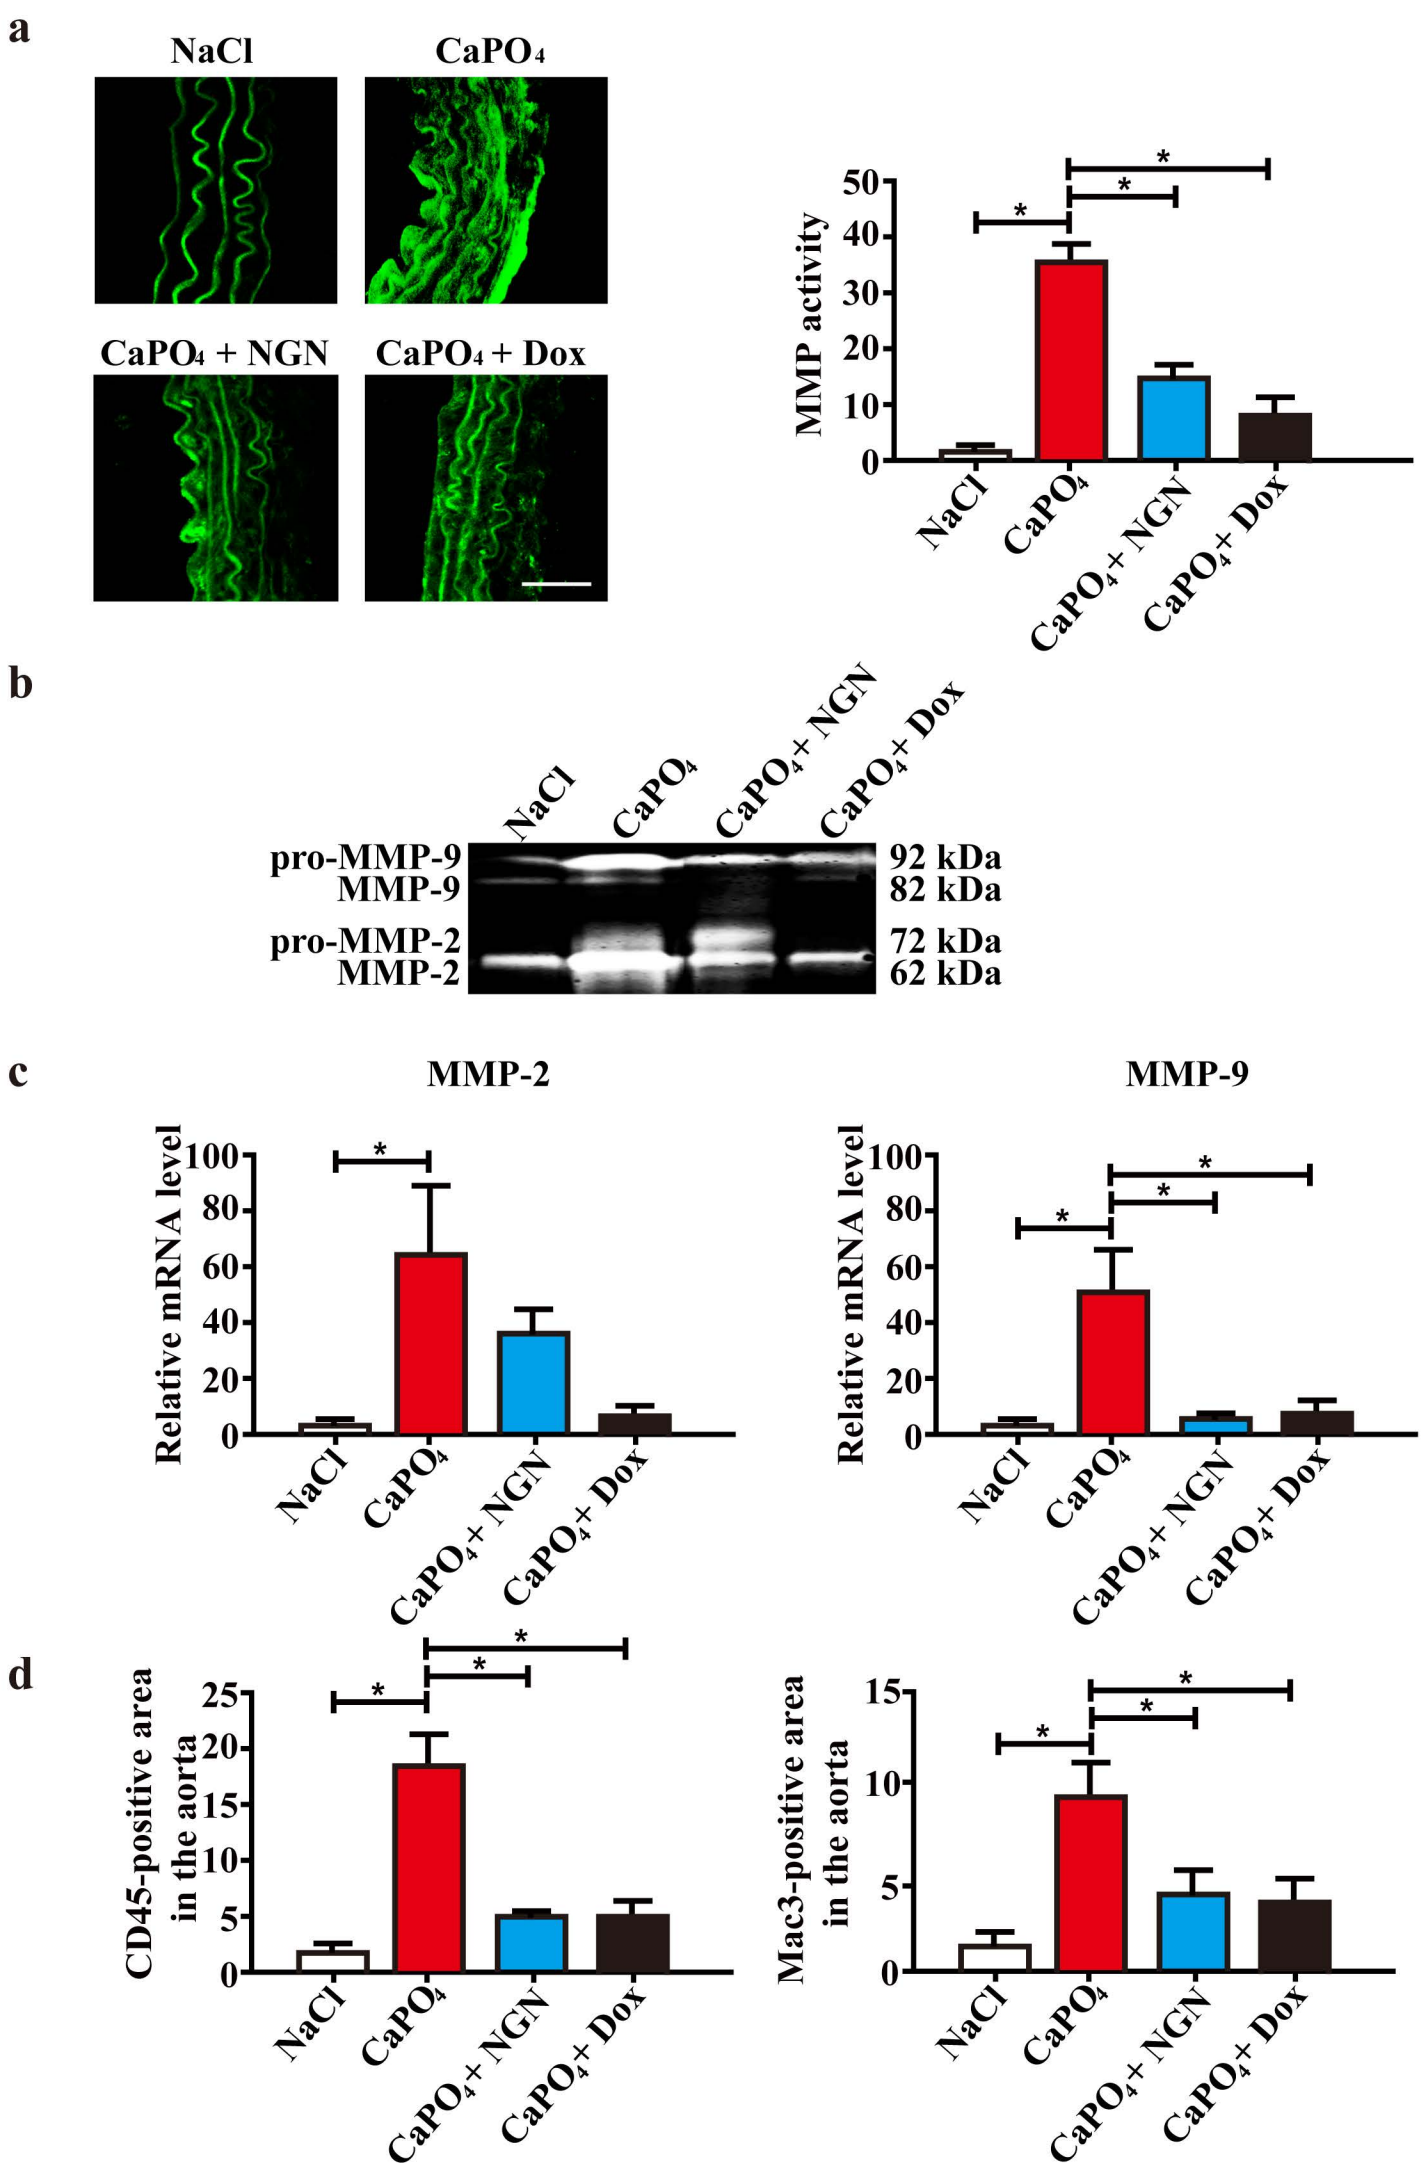

Supplementary Fig.S1

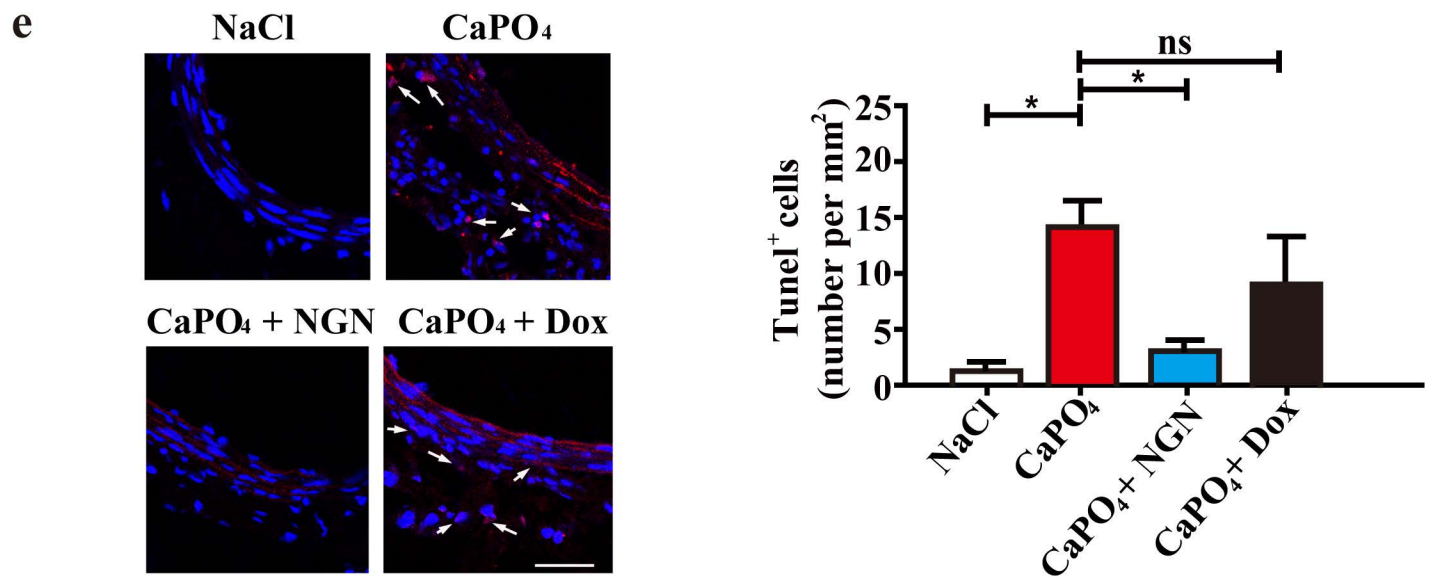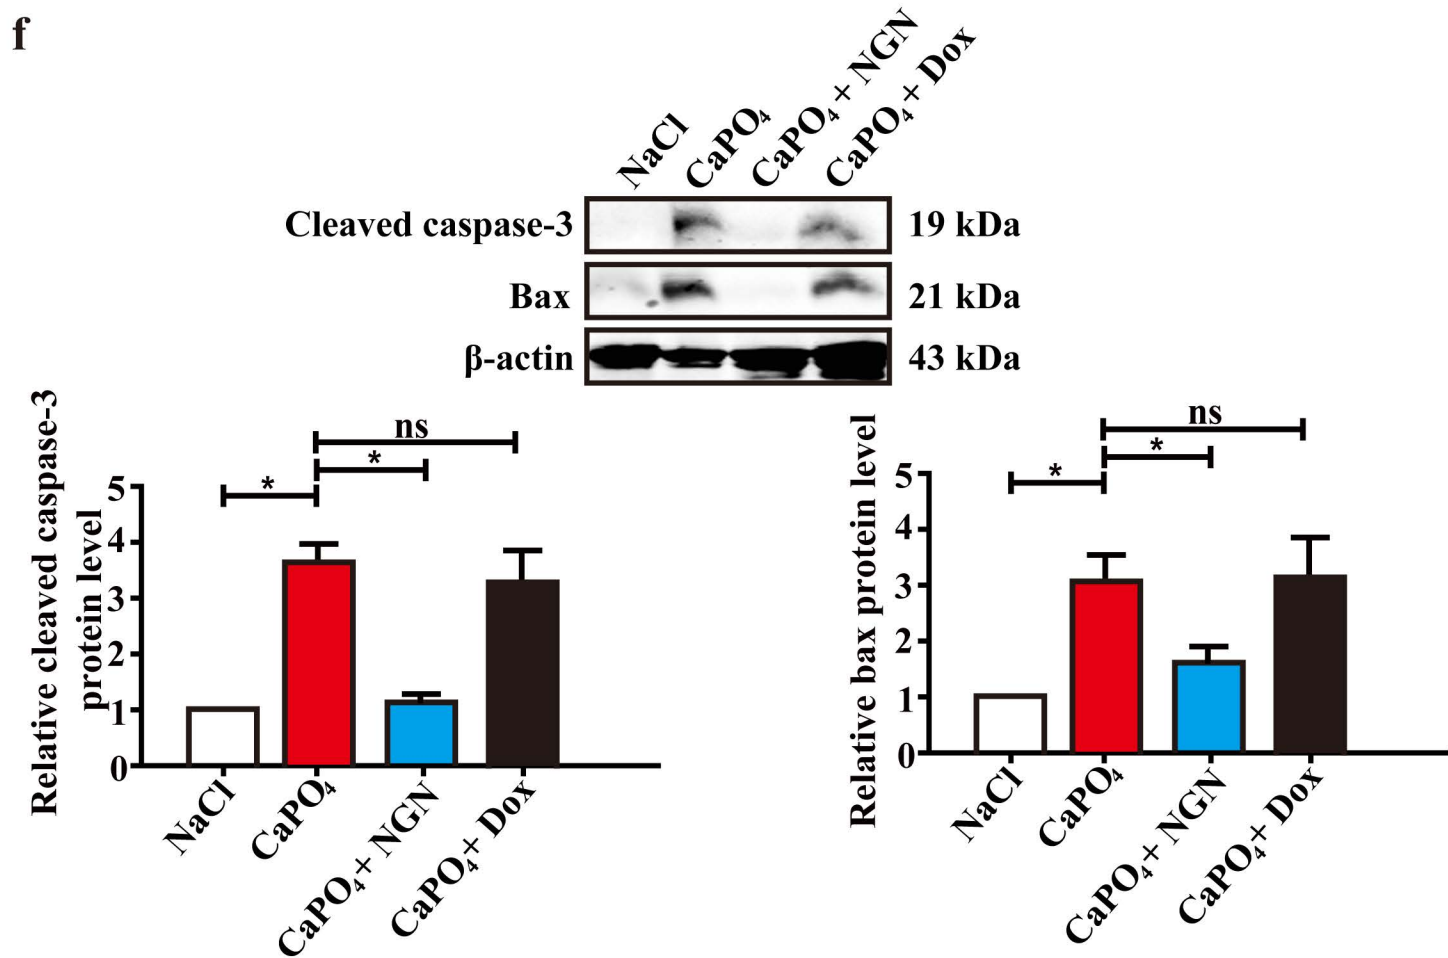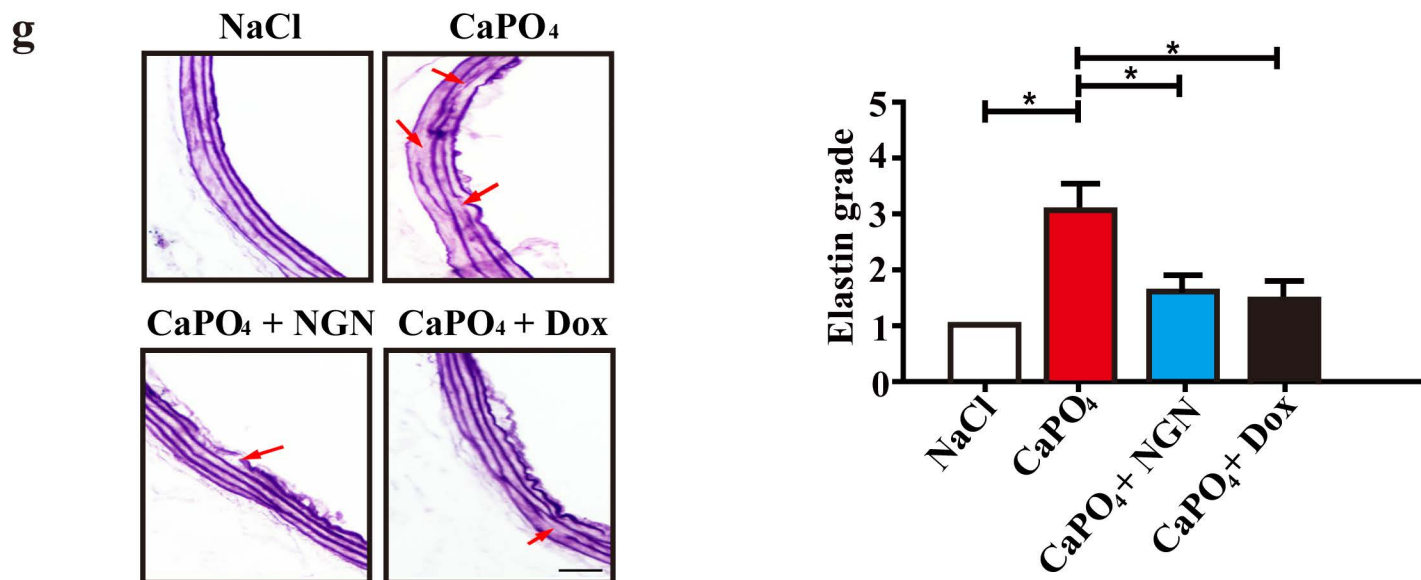

Supplementary Fig. S1 continued 1

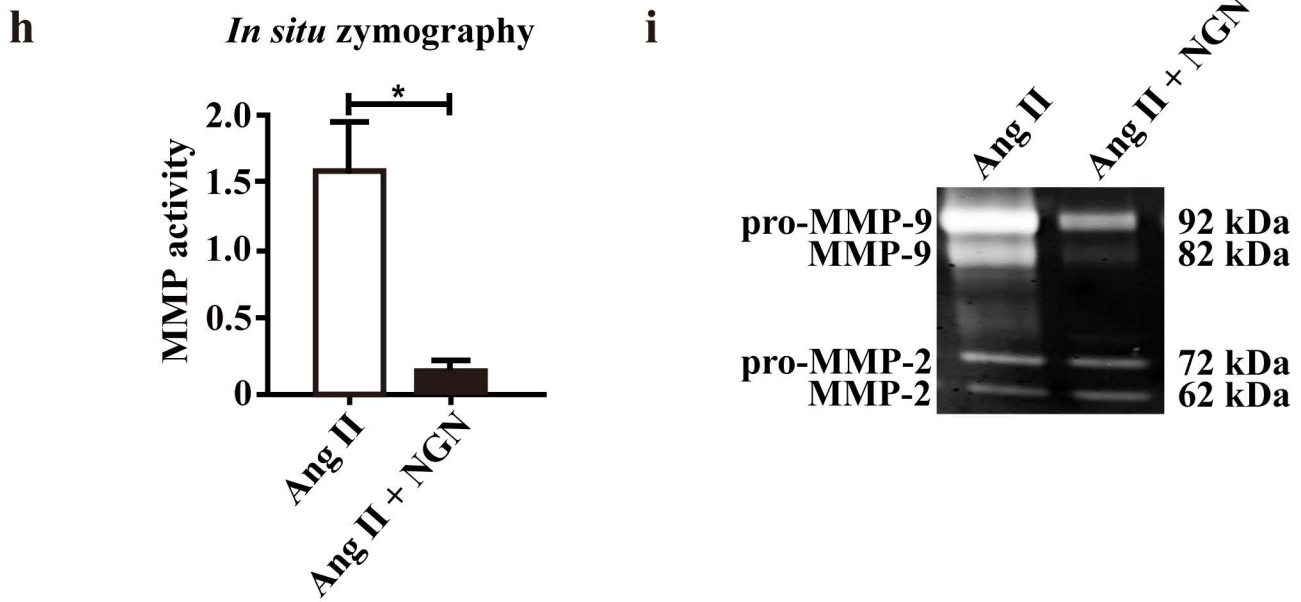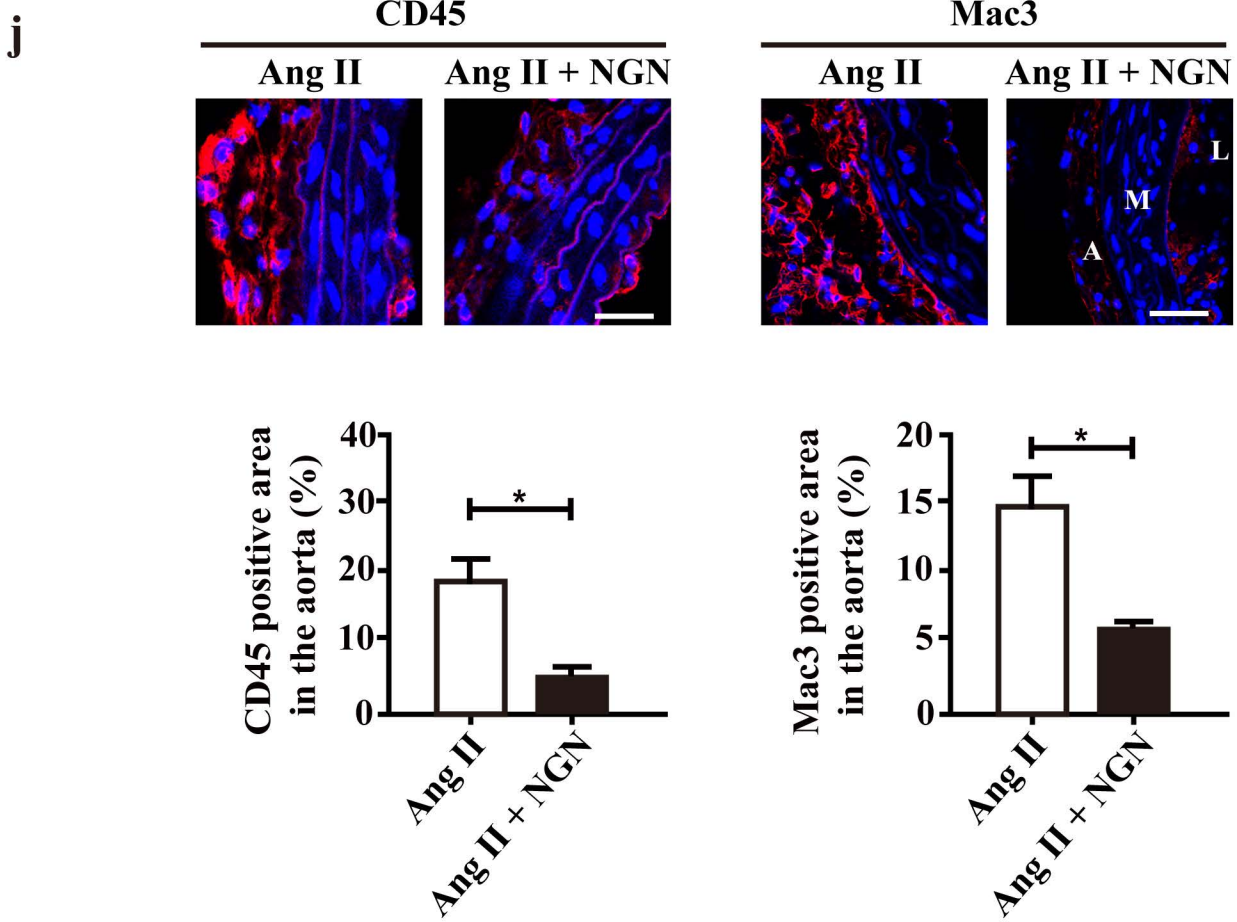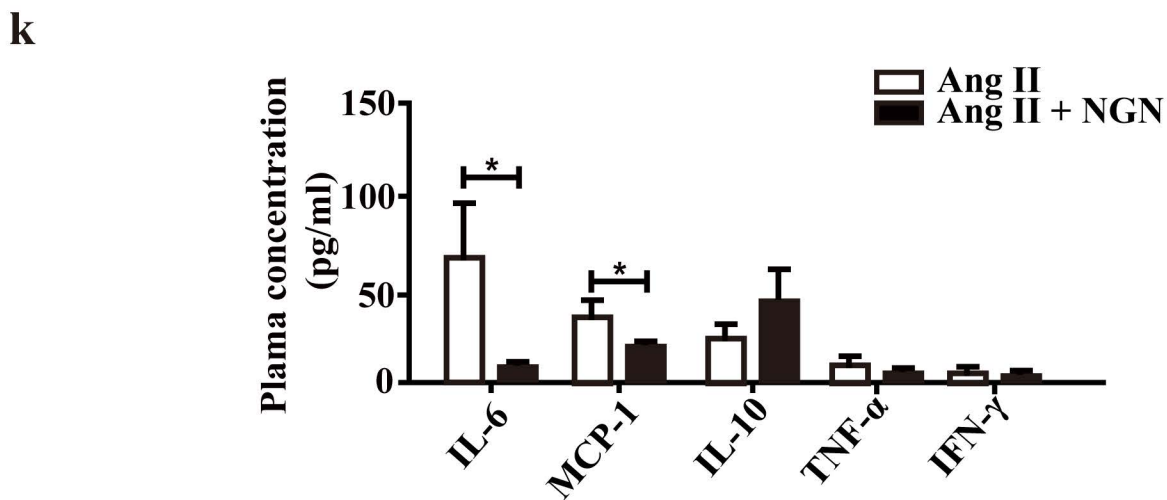

I

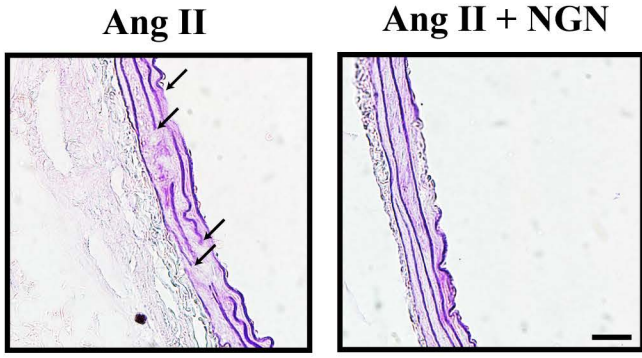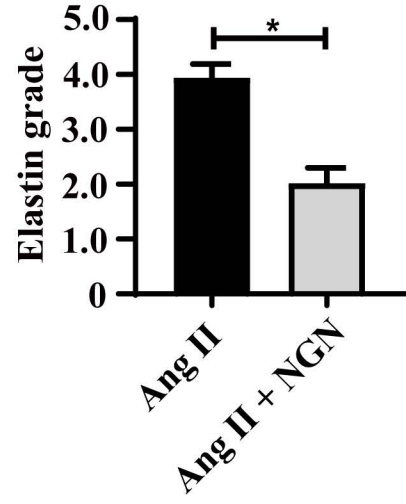

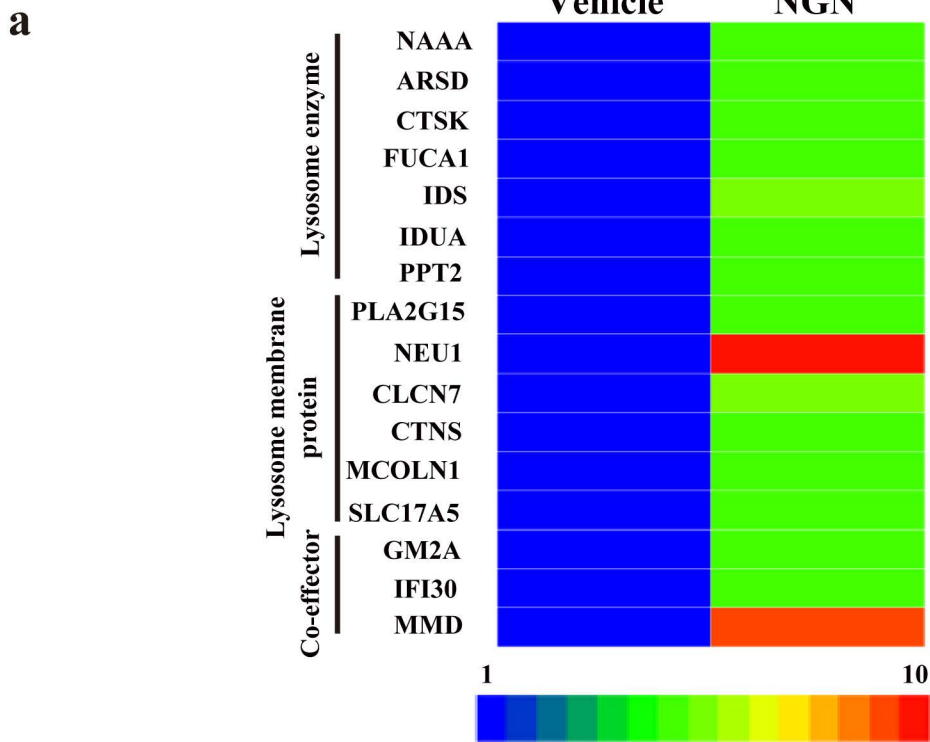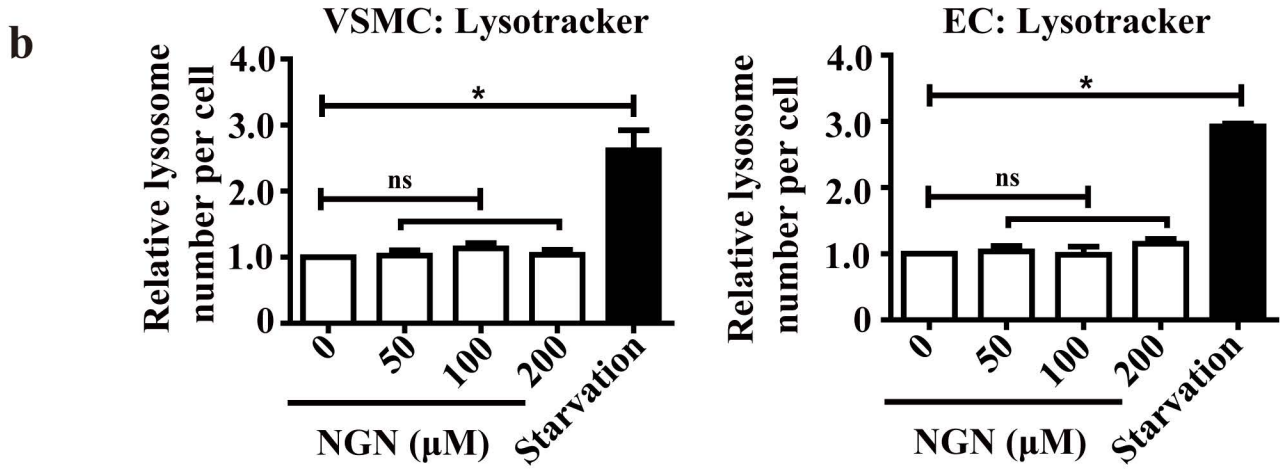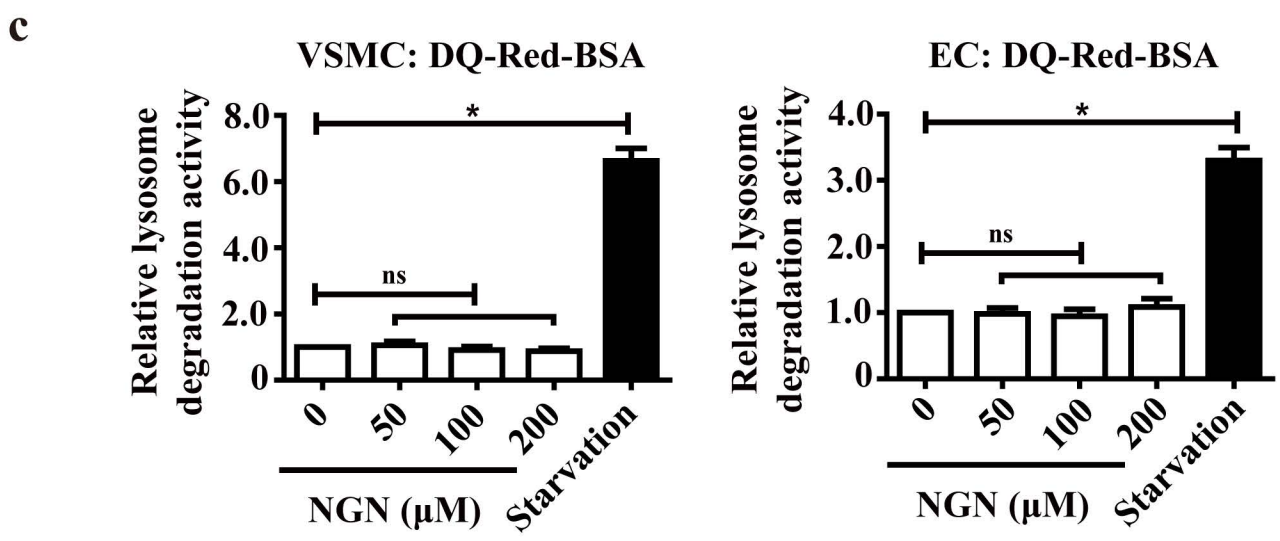

Supplementary Fig. S2

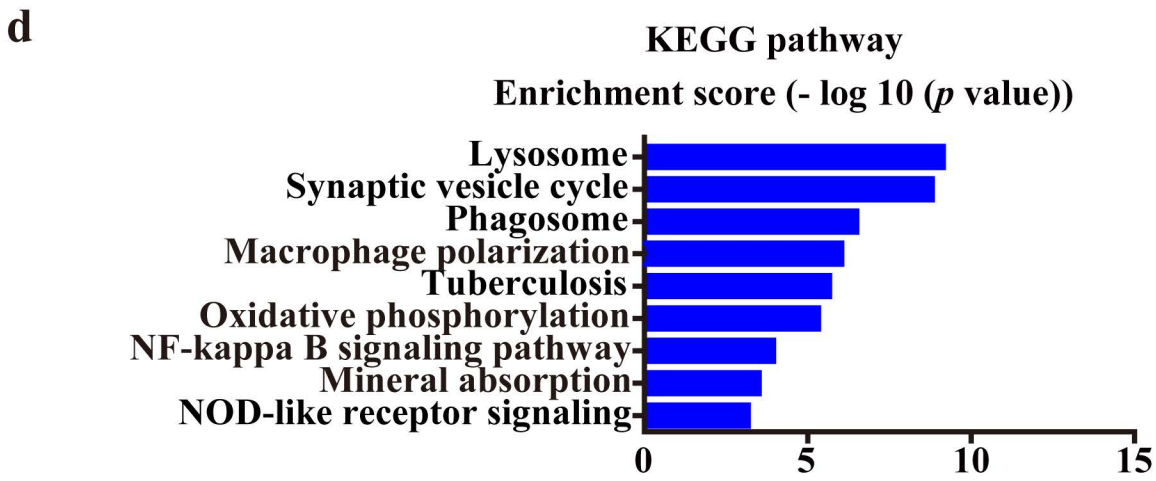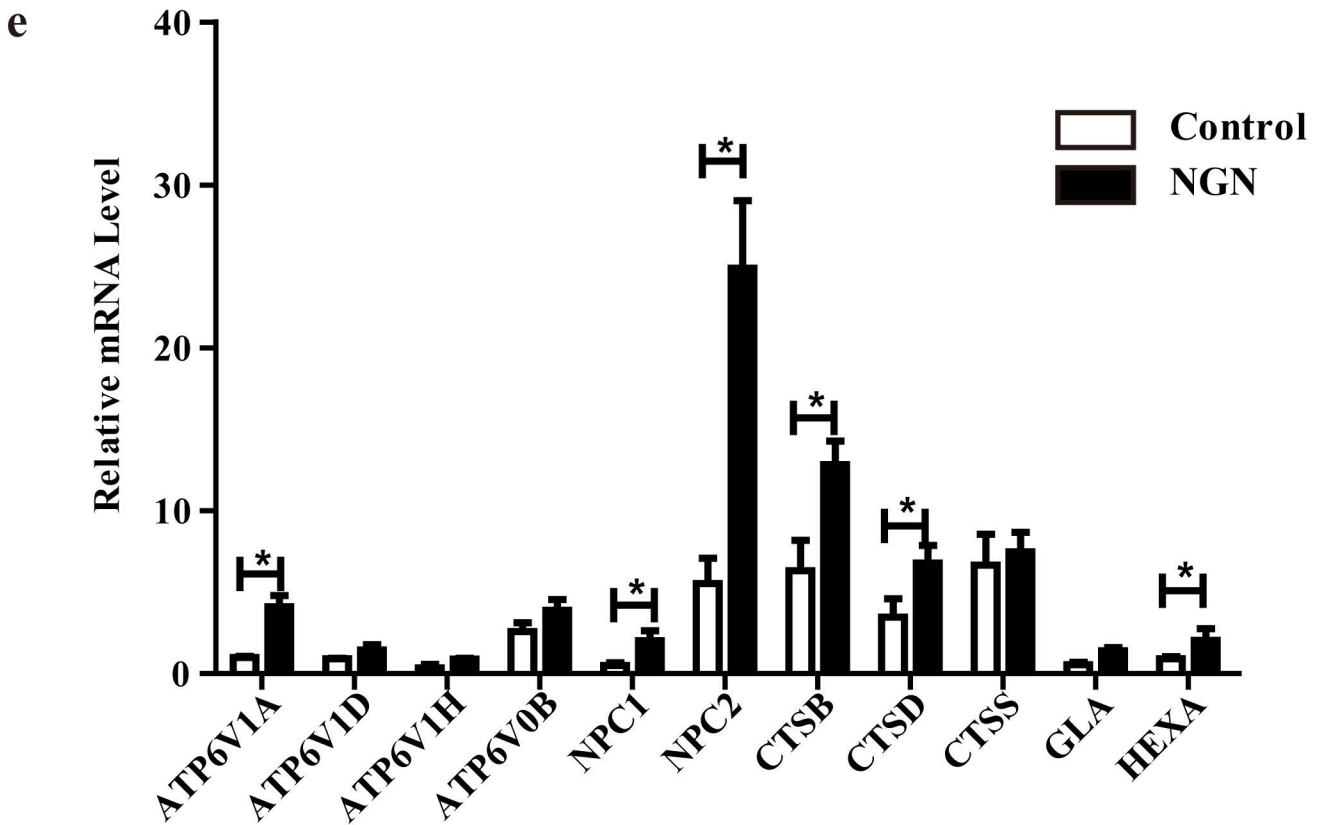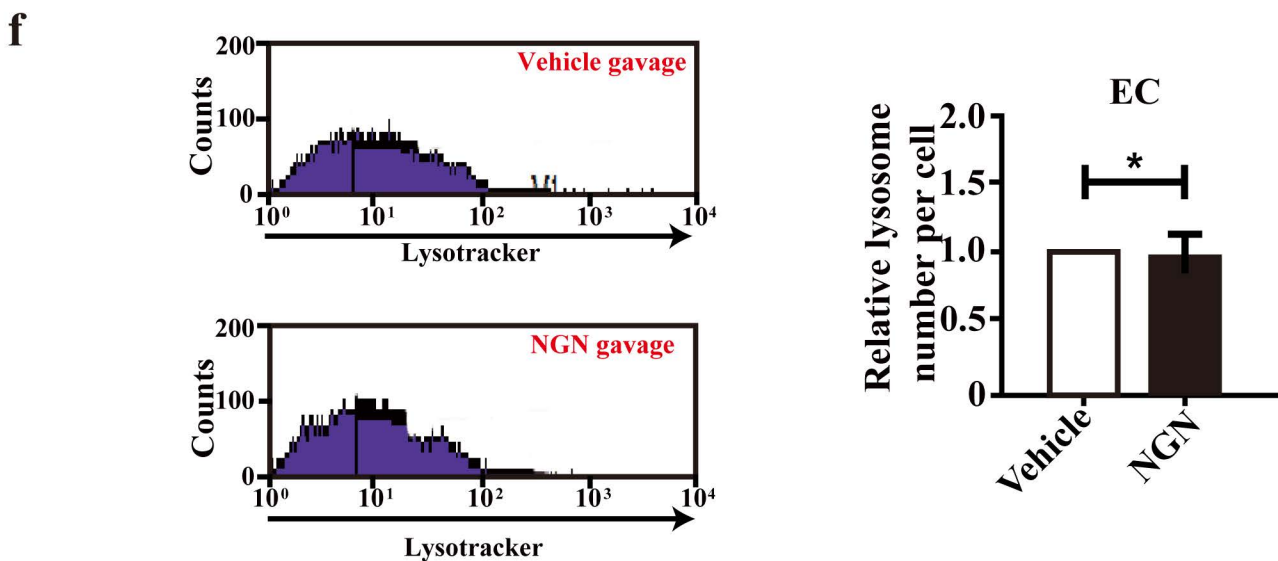

g

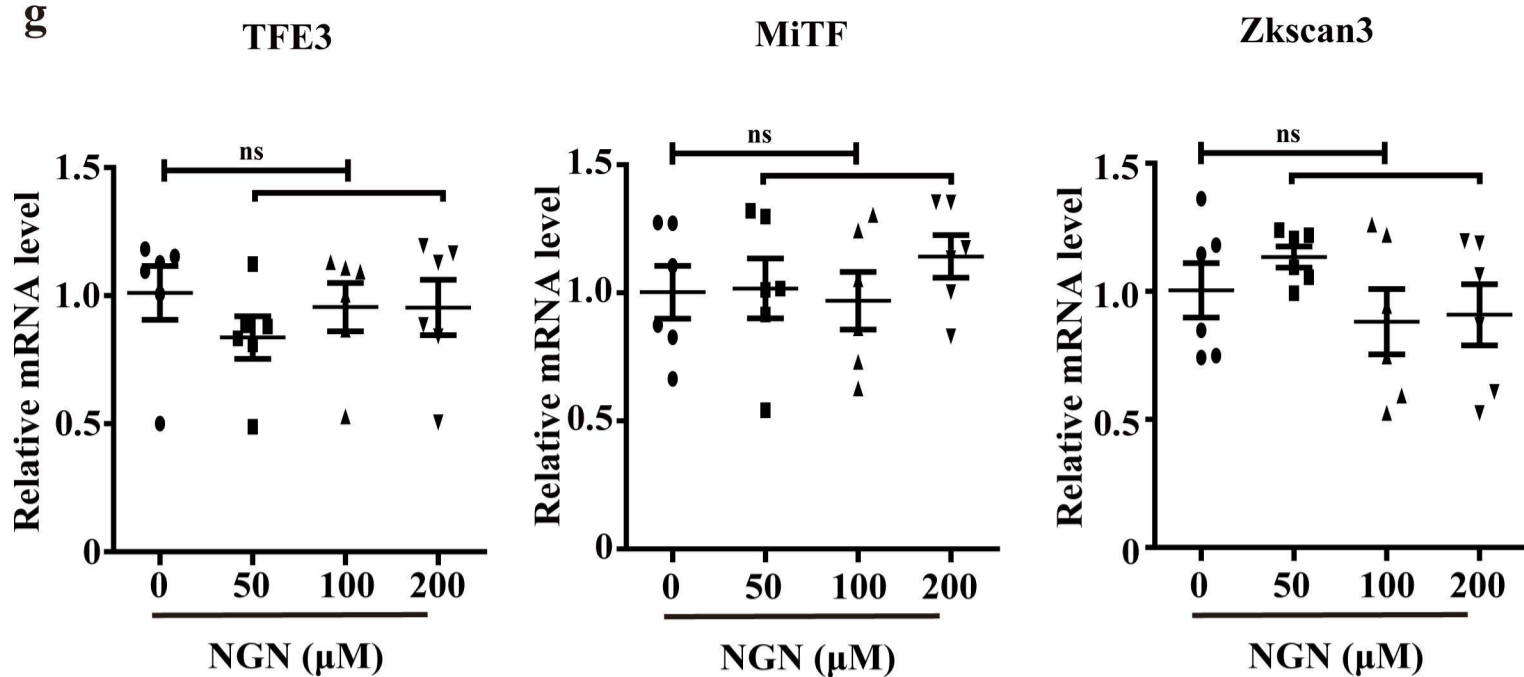

h

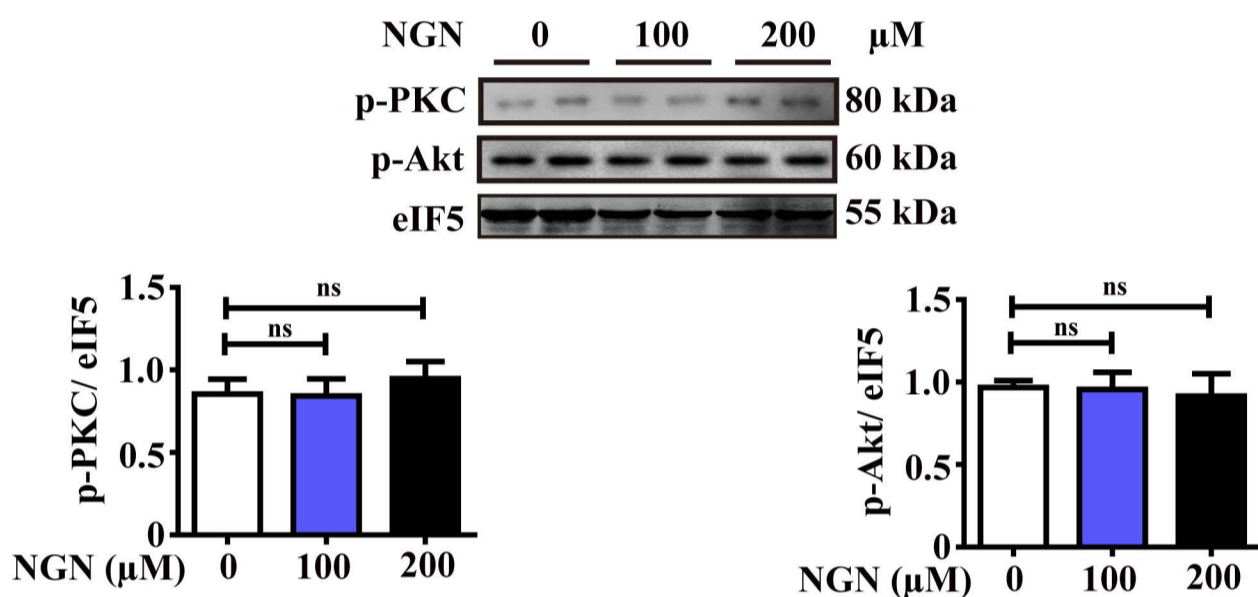

i

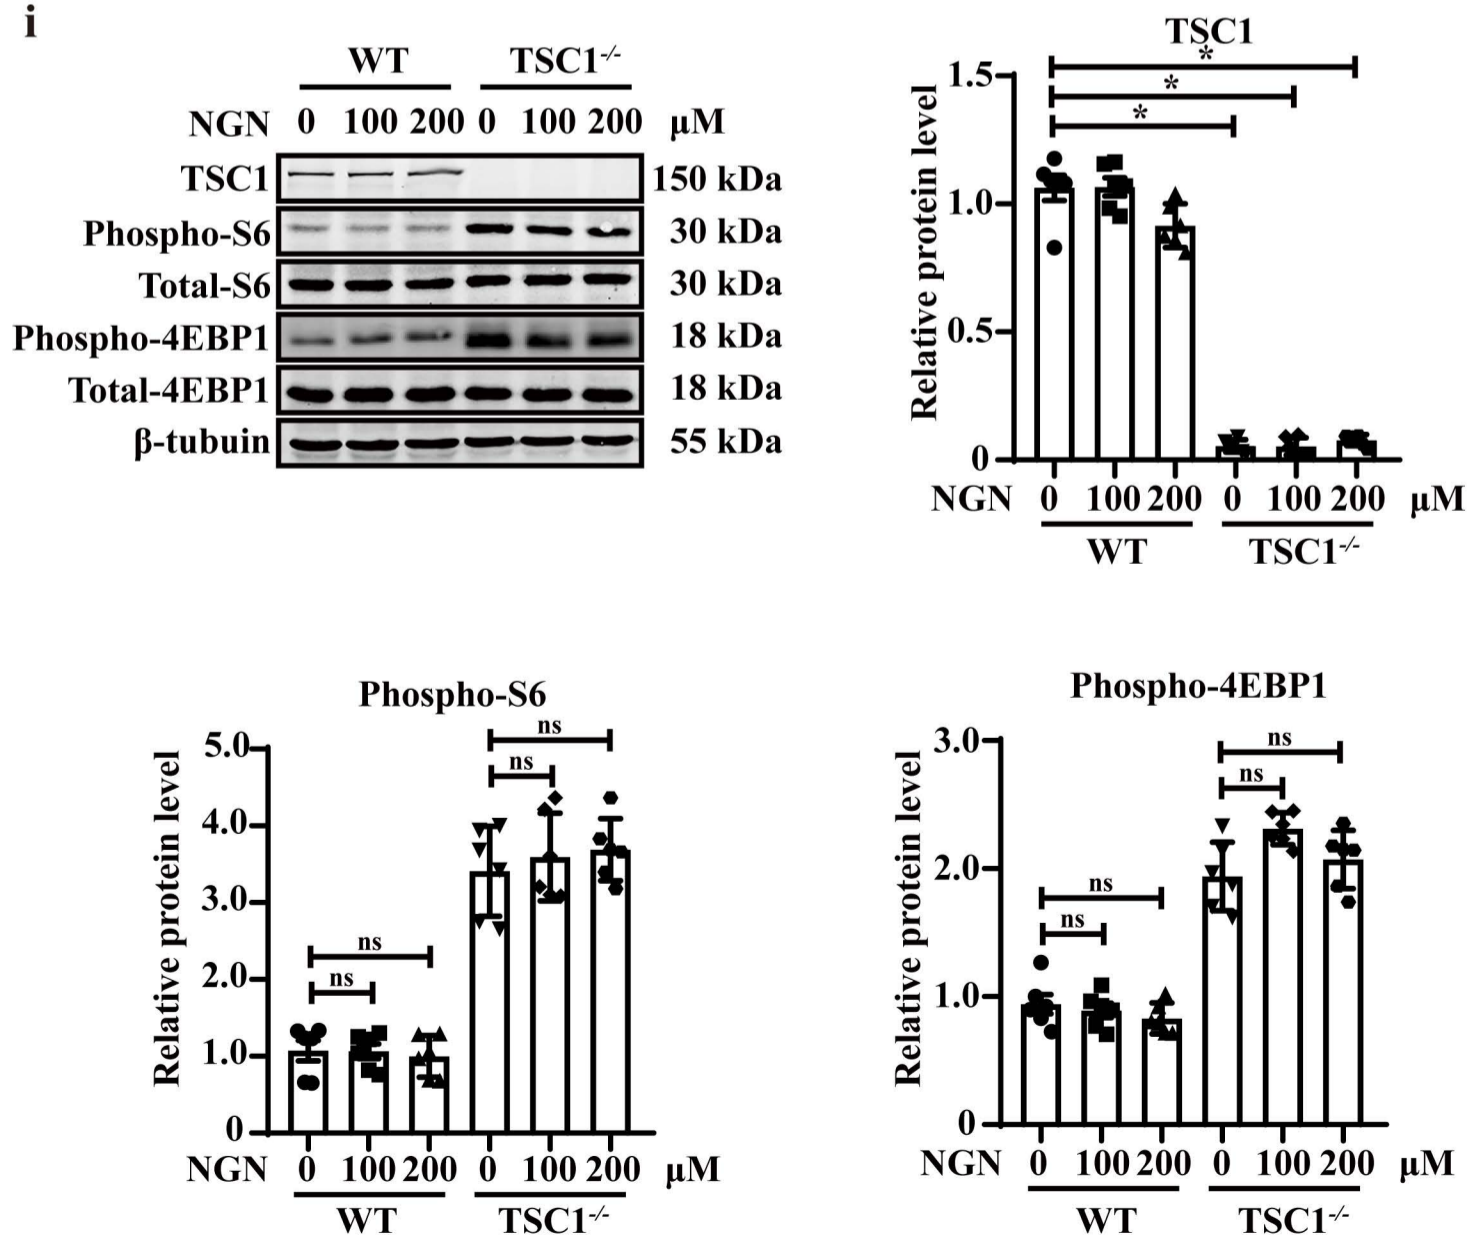



**j**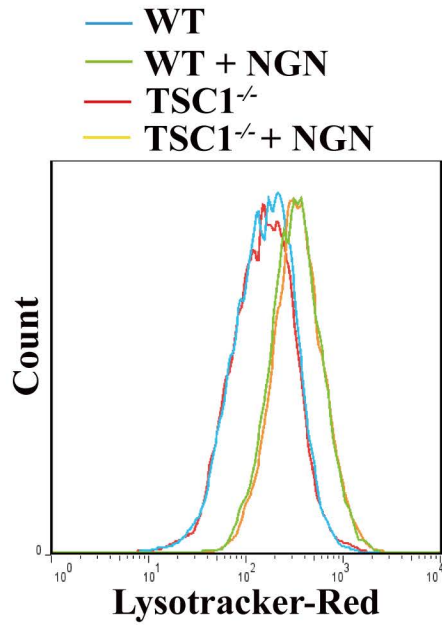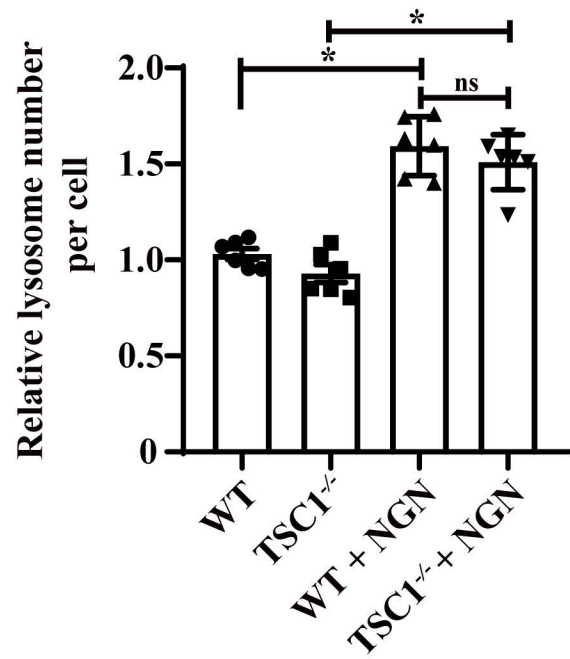**k**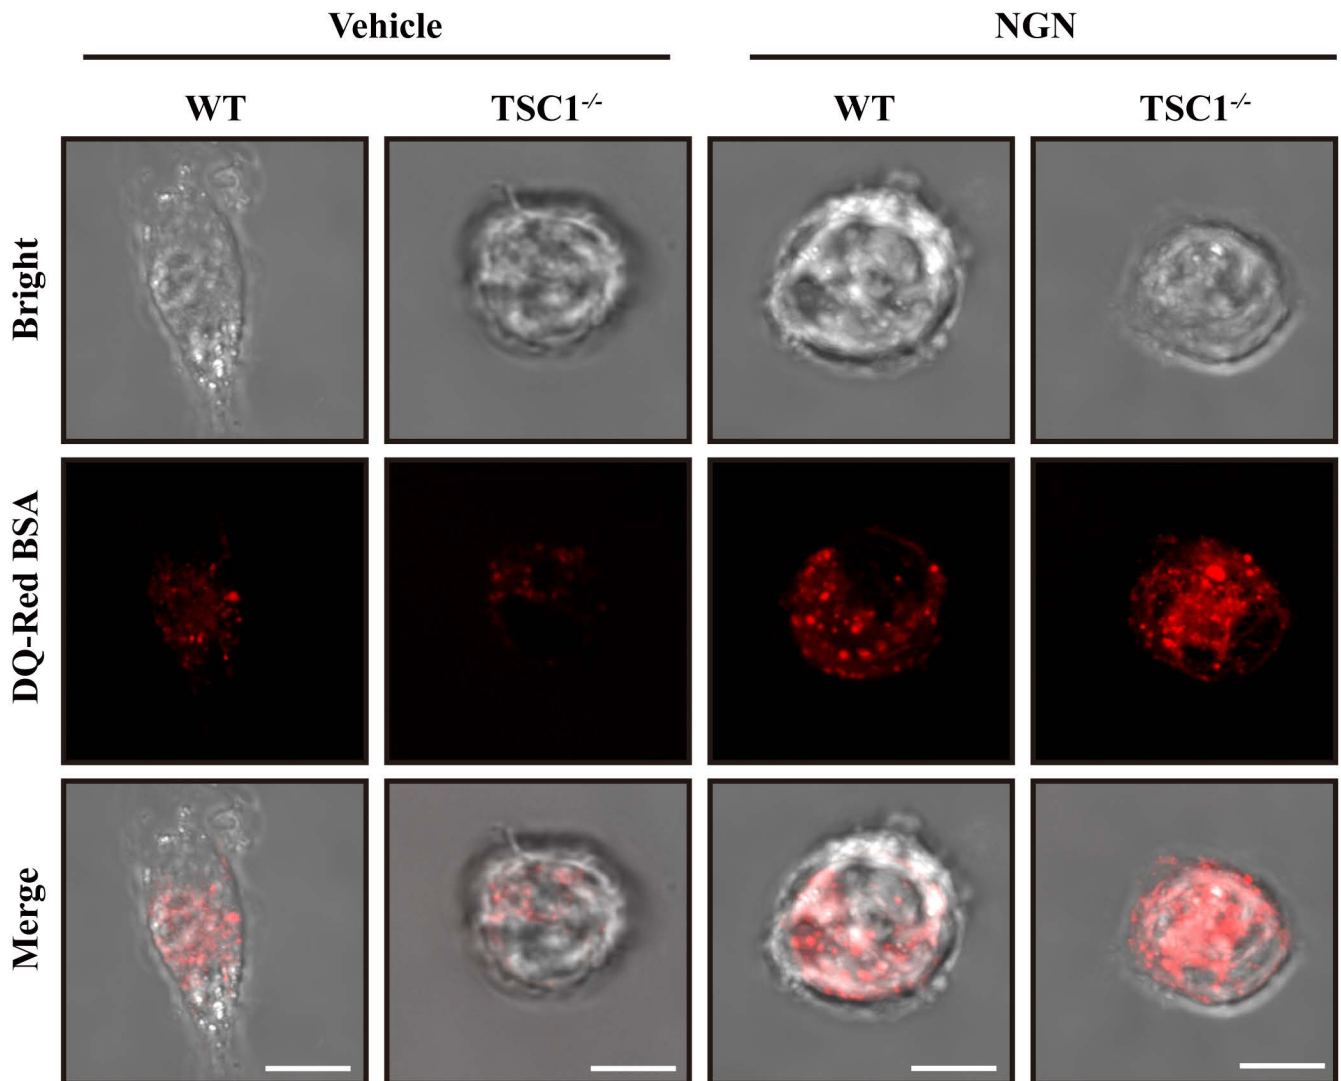

l

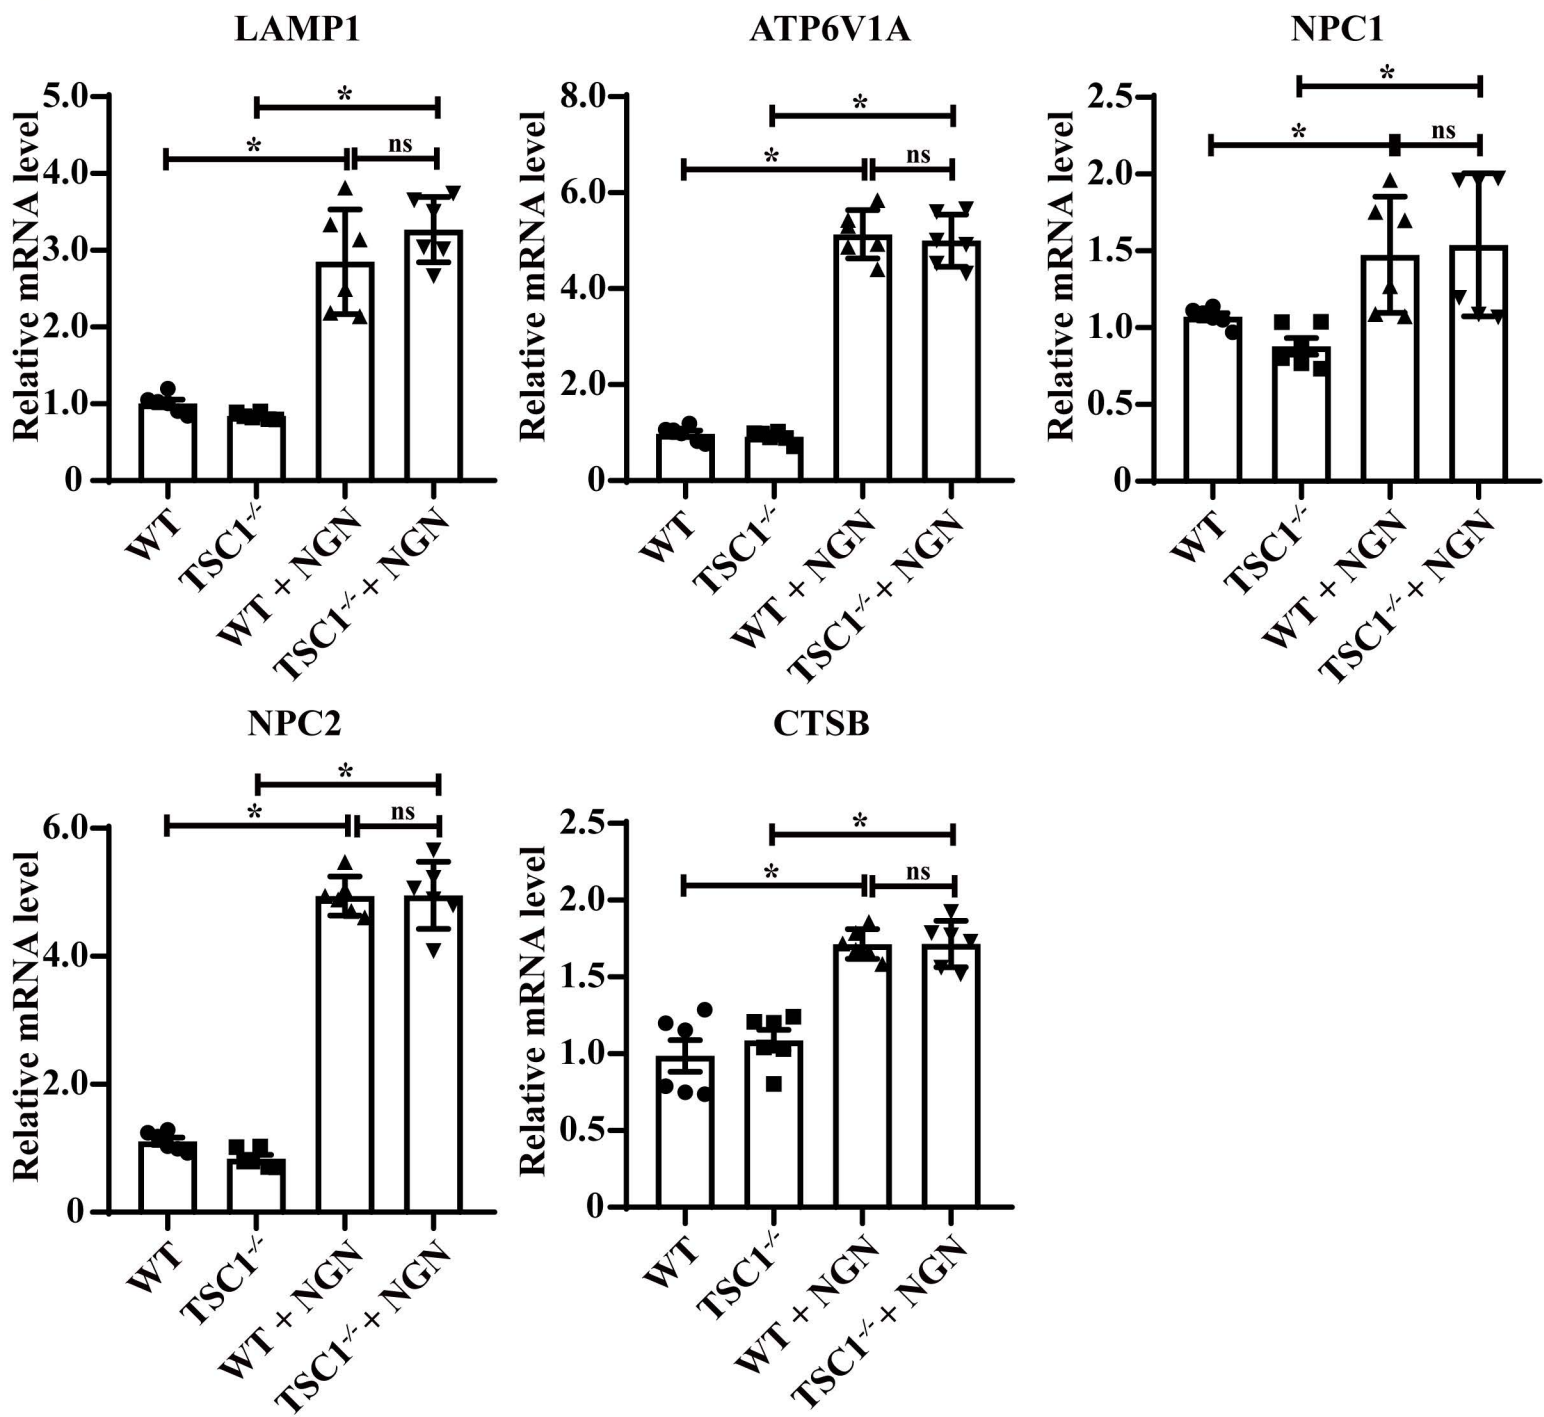

m

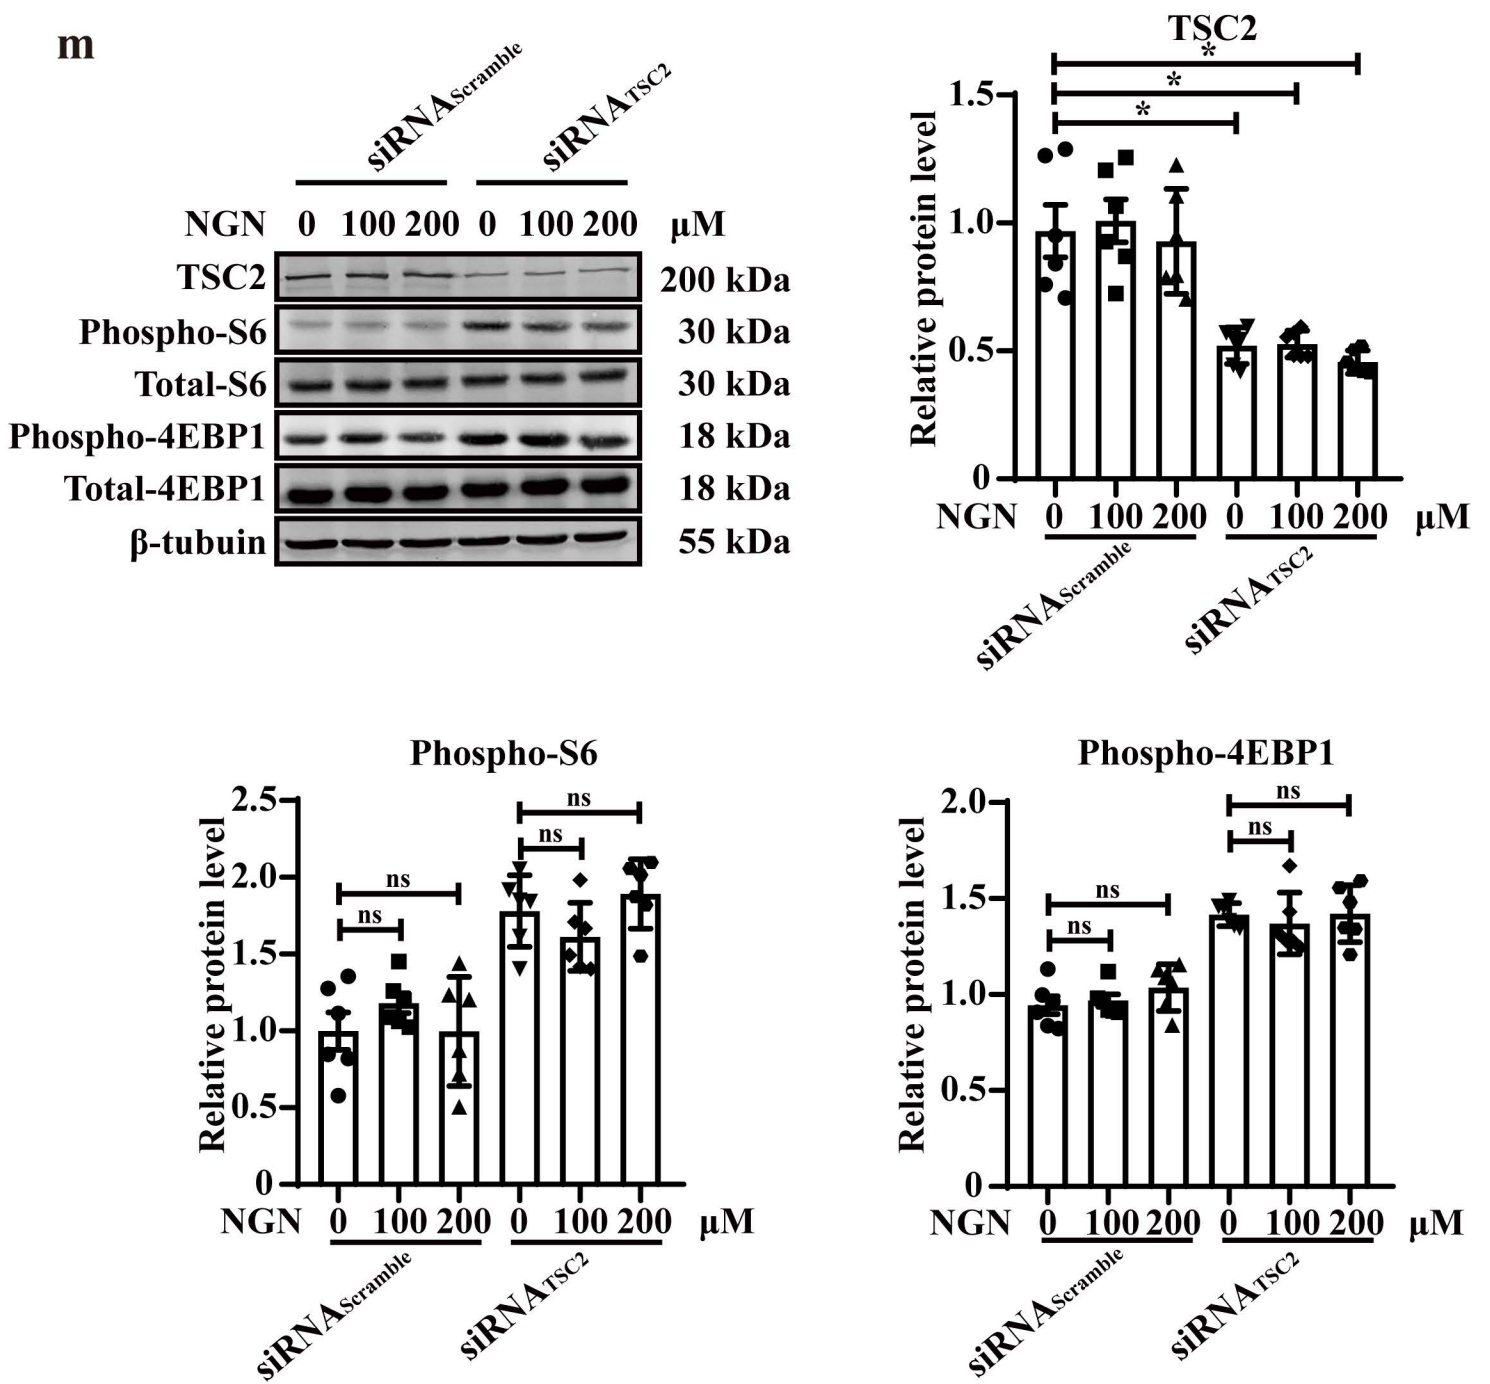

**n**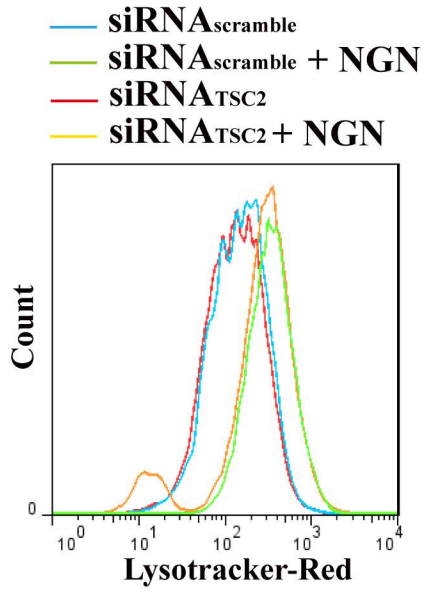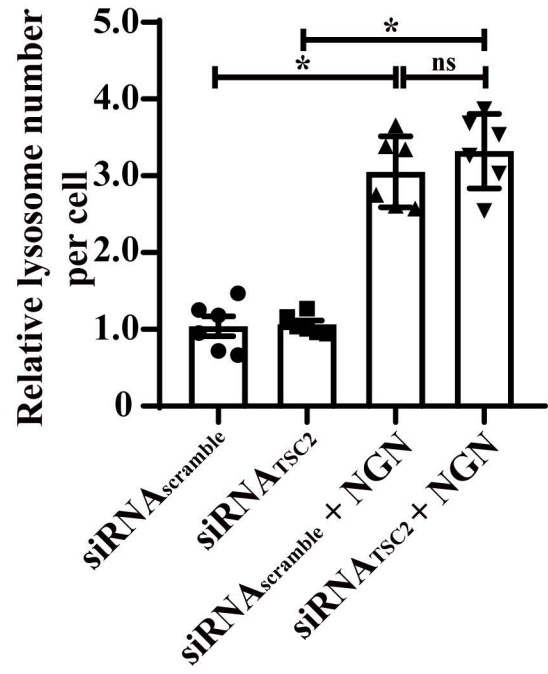**o**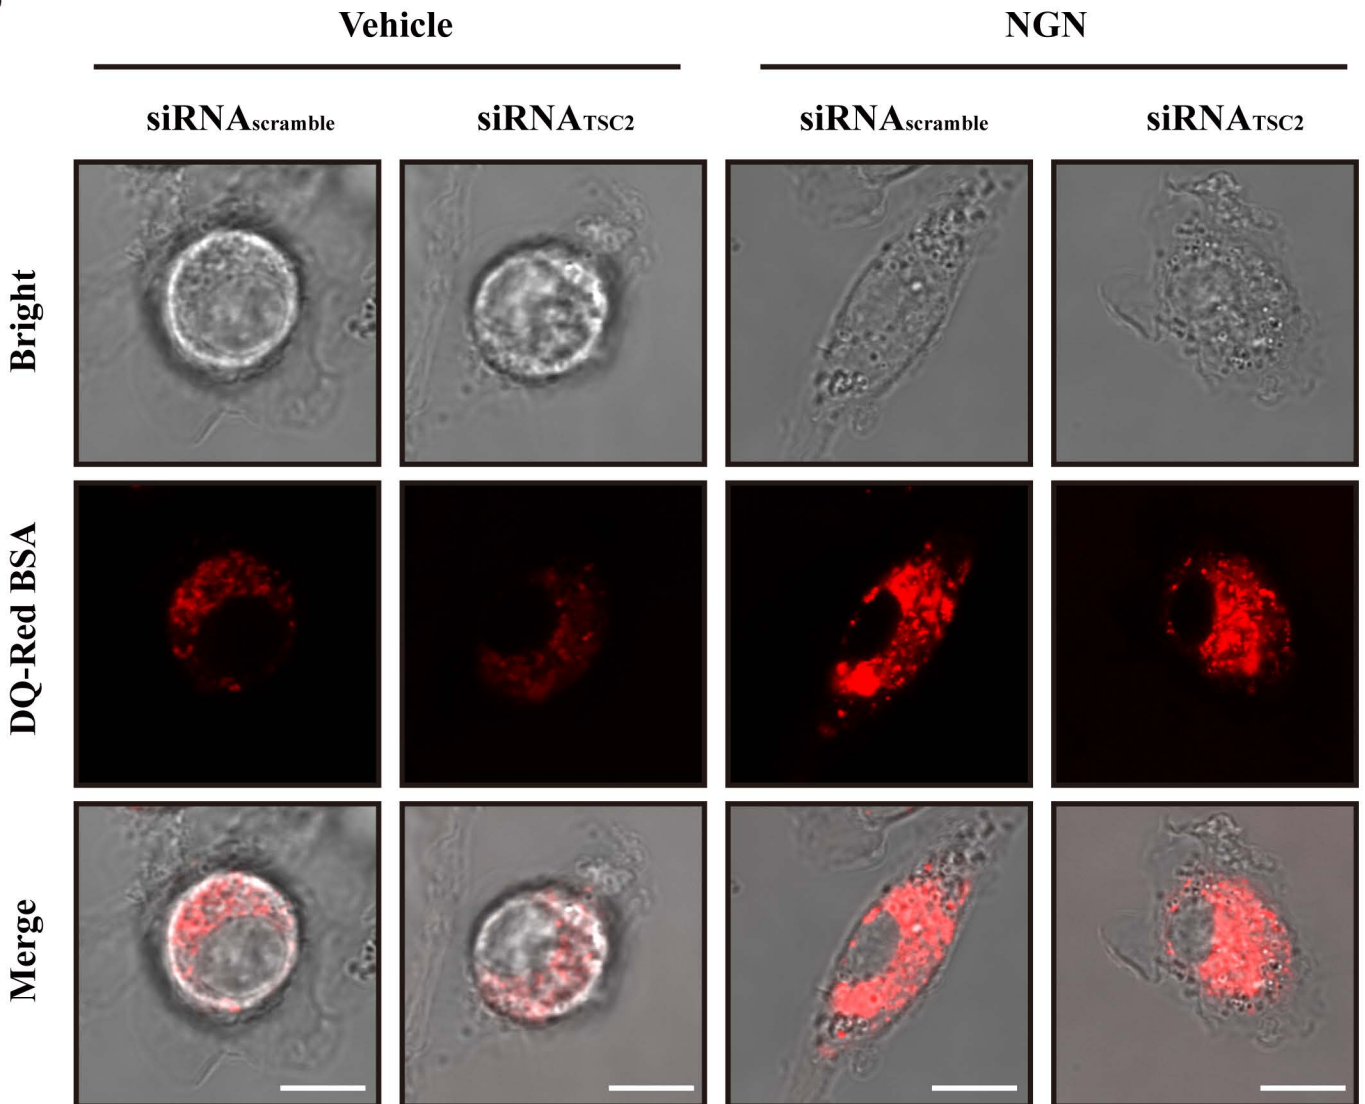

p

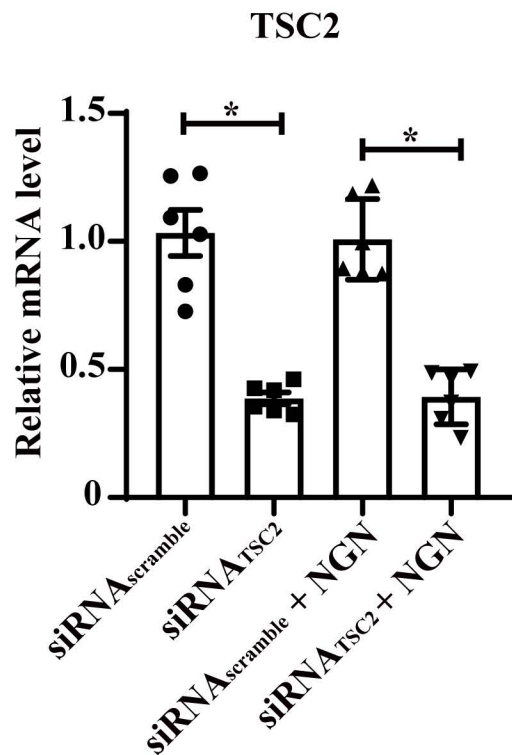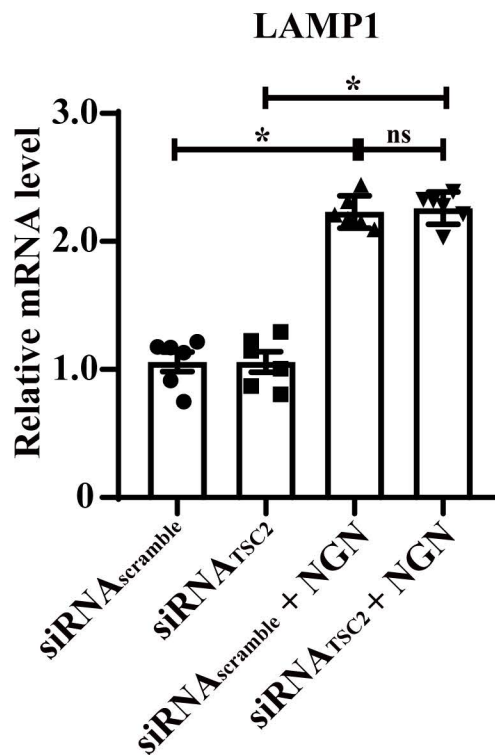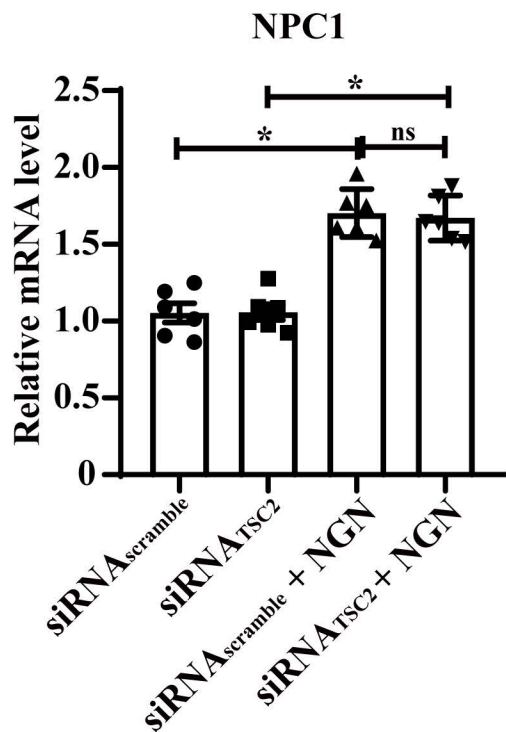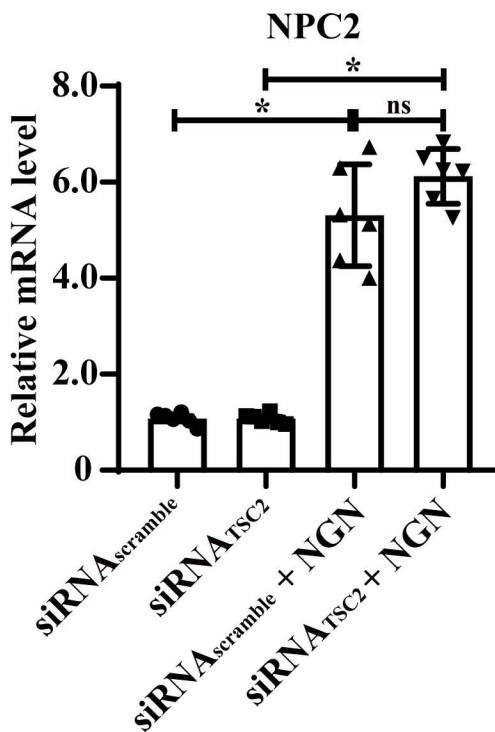

Supplementary Fig.S2 continued 6

q

CaPO<sub>4</sub> + Water gavage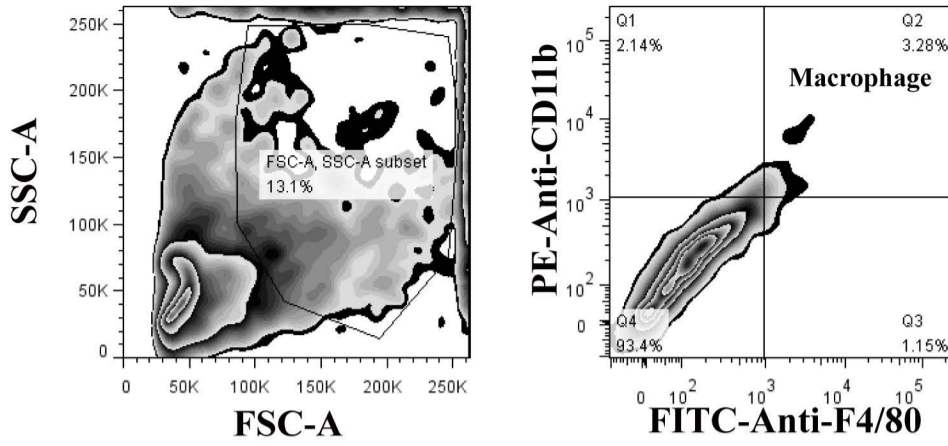CaPO<sub>4</sub> + NGN gavage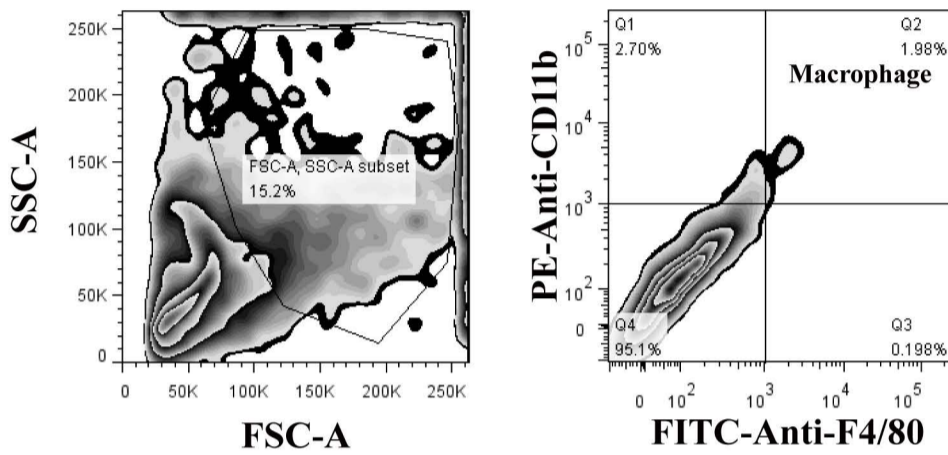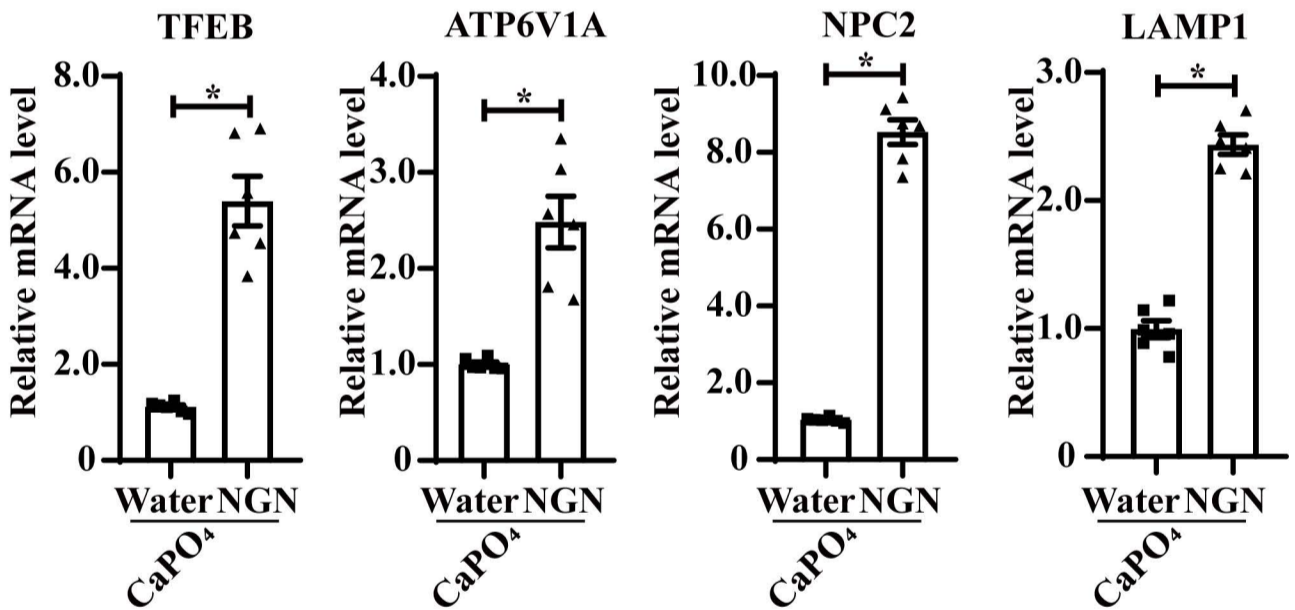

r

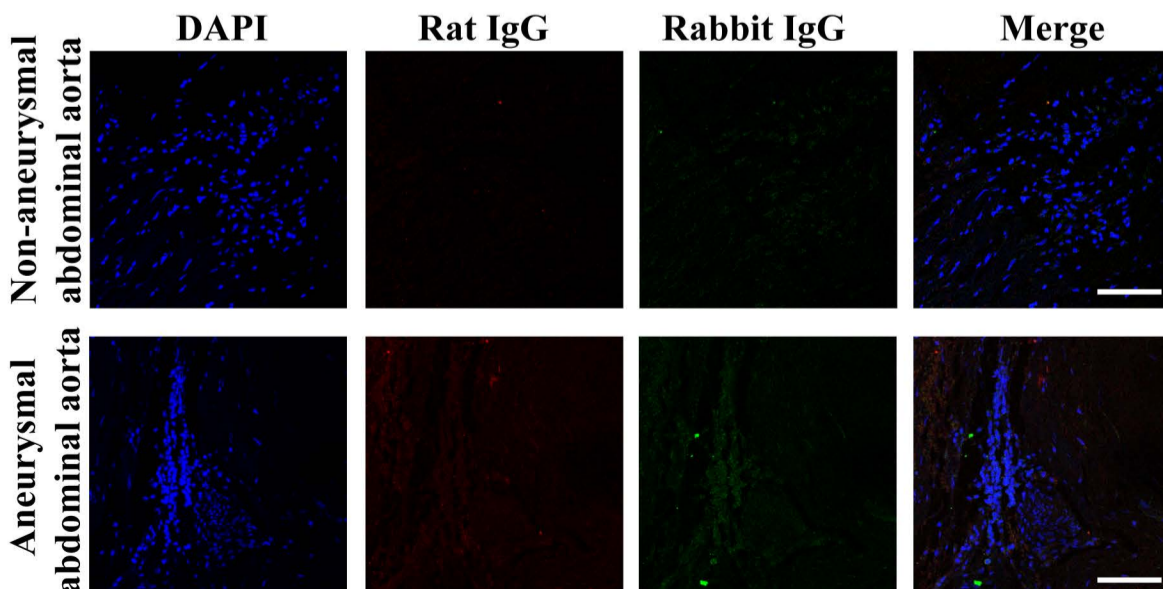

**a**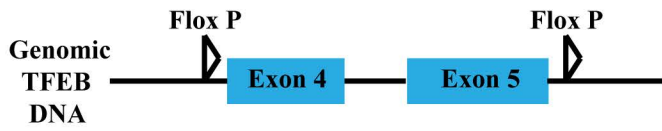**b**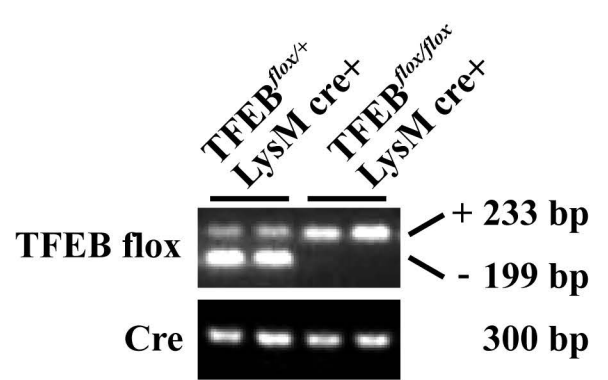**c**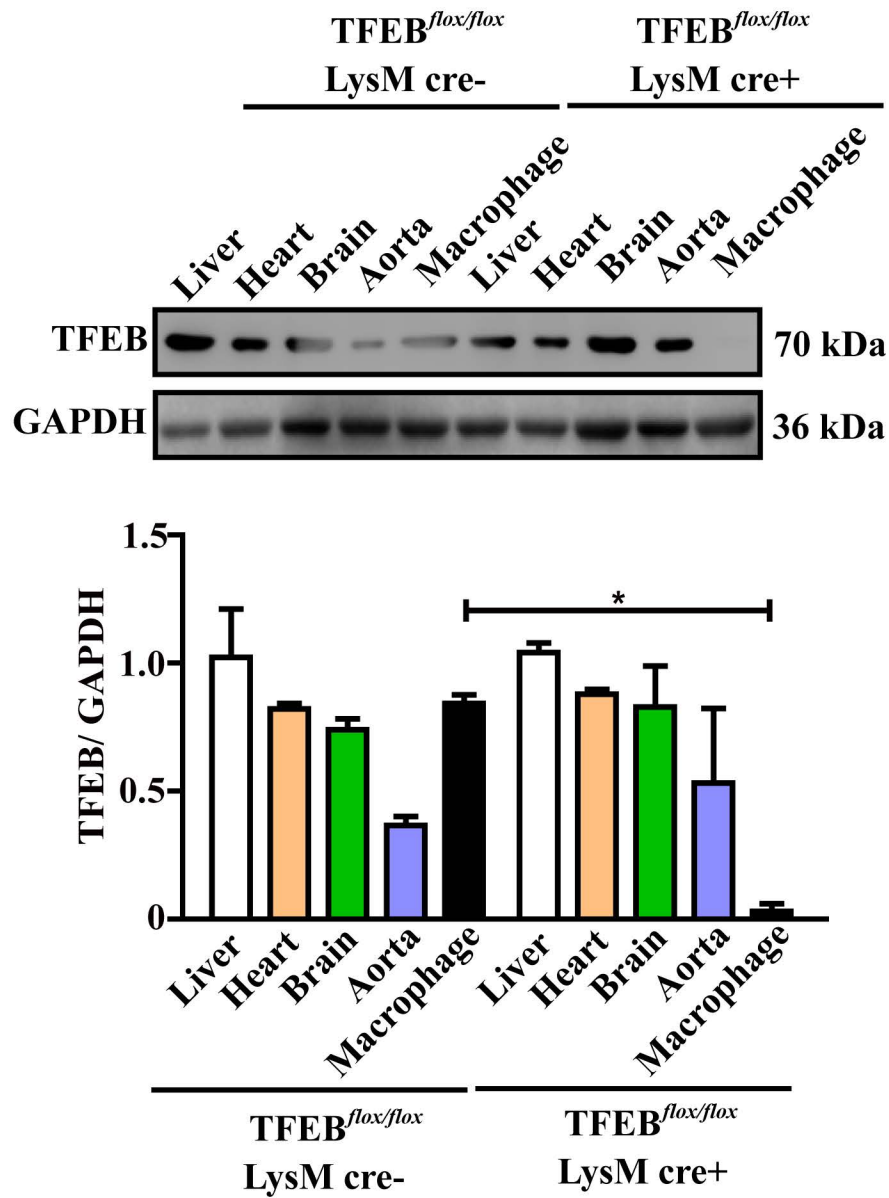

Supplementary Fig.S3

**d**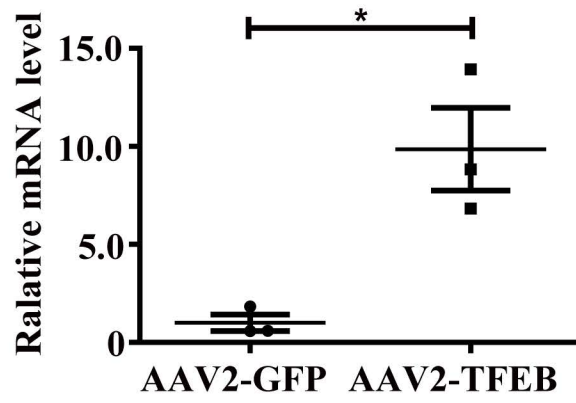**e**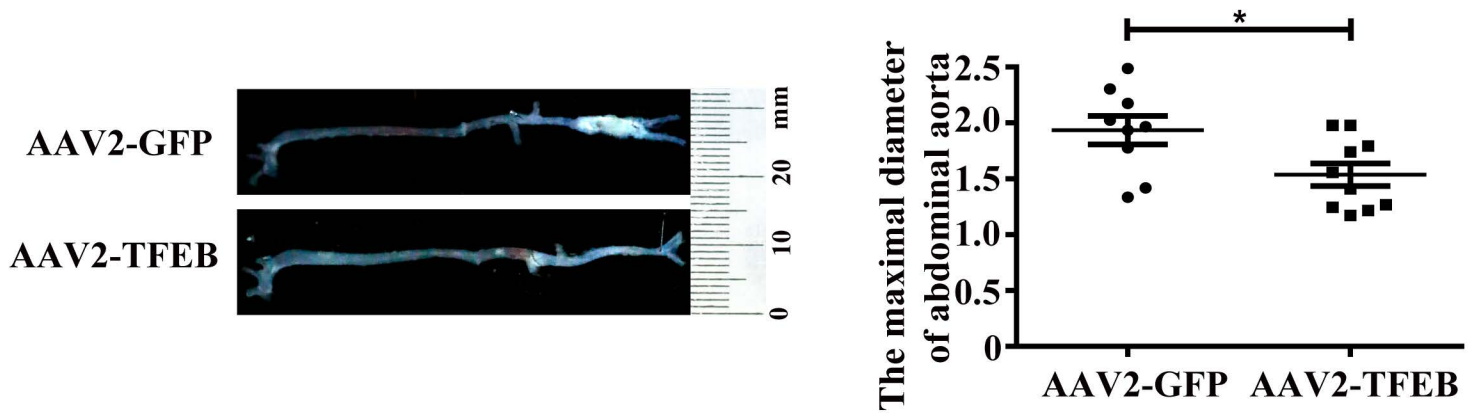**f**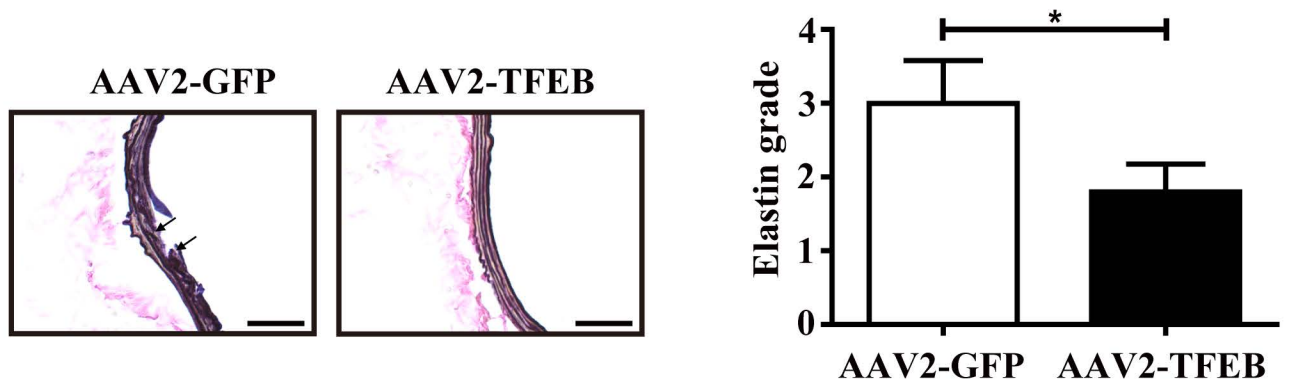**g**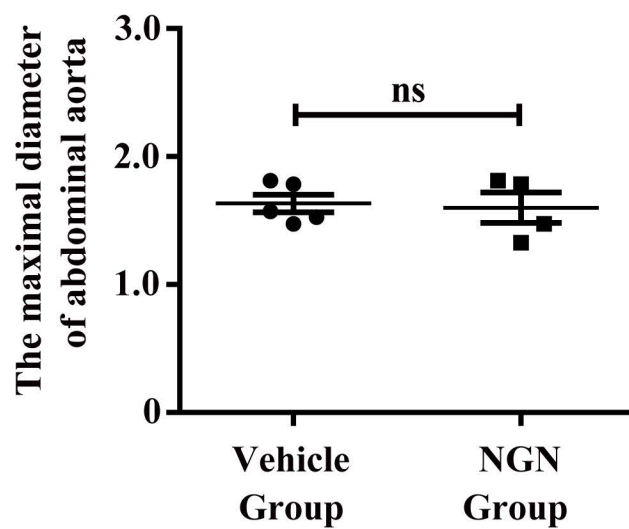

**a**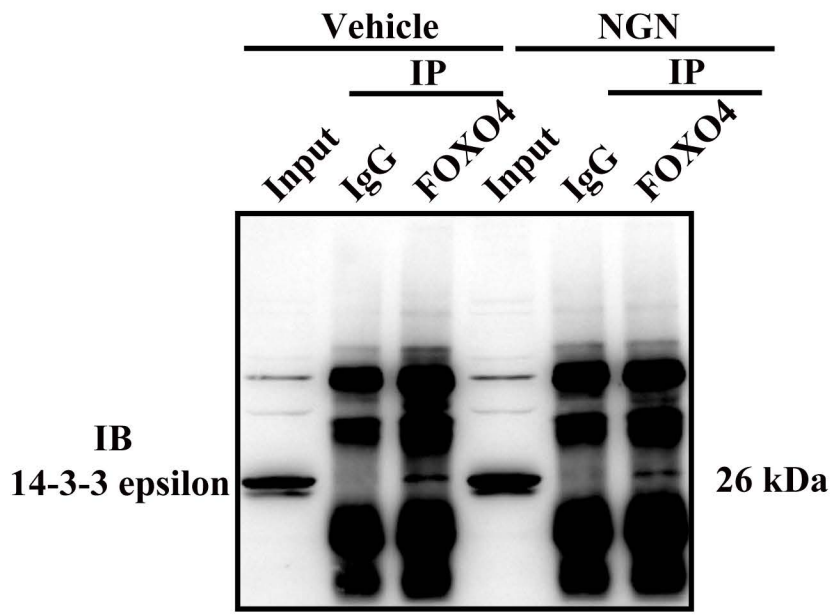**b**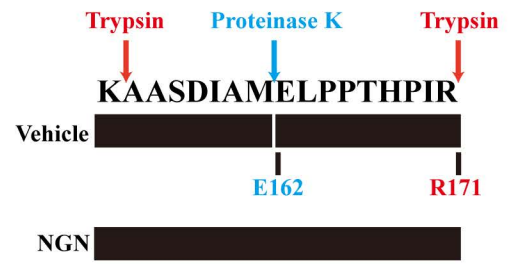**c**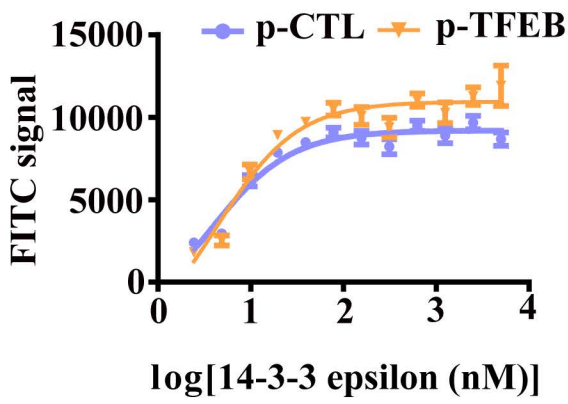**d**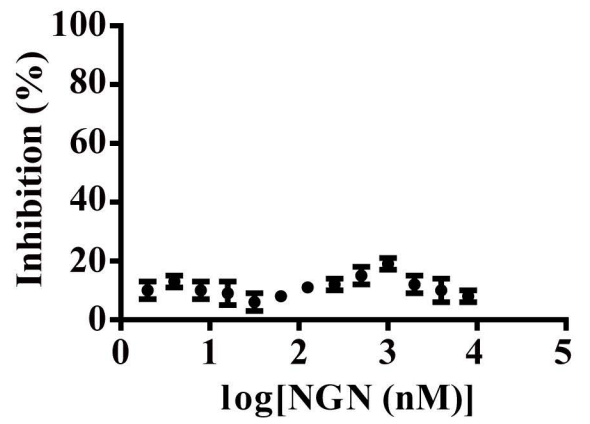**e**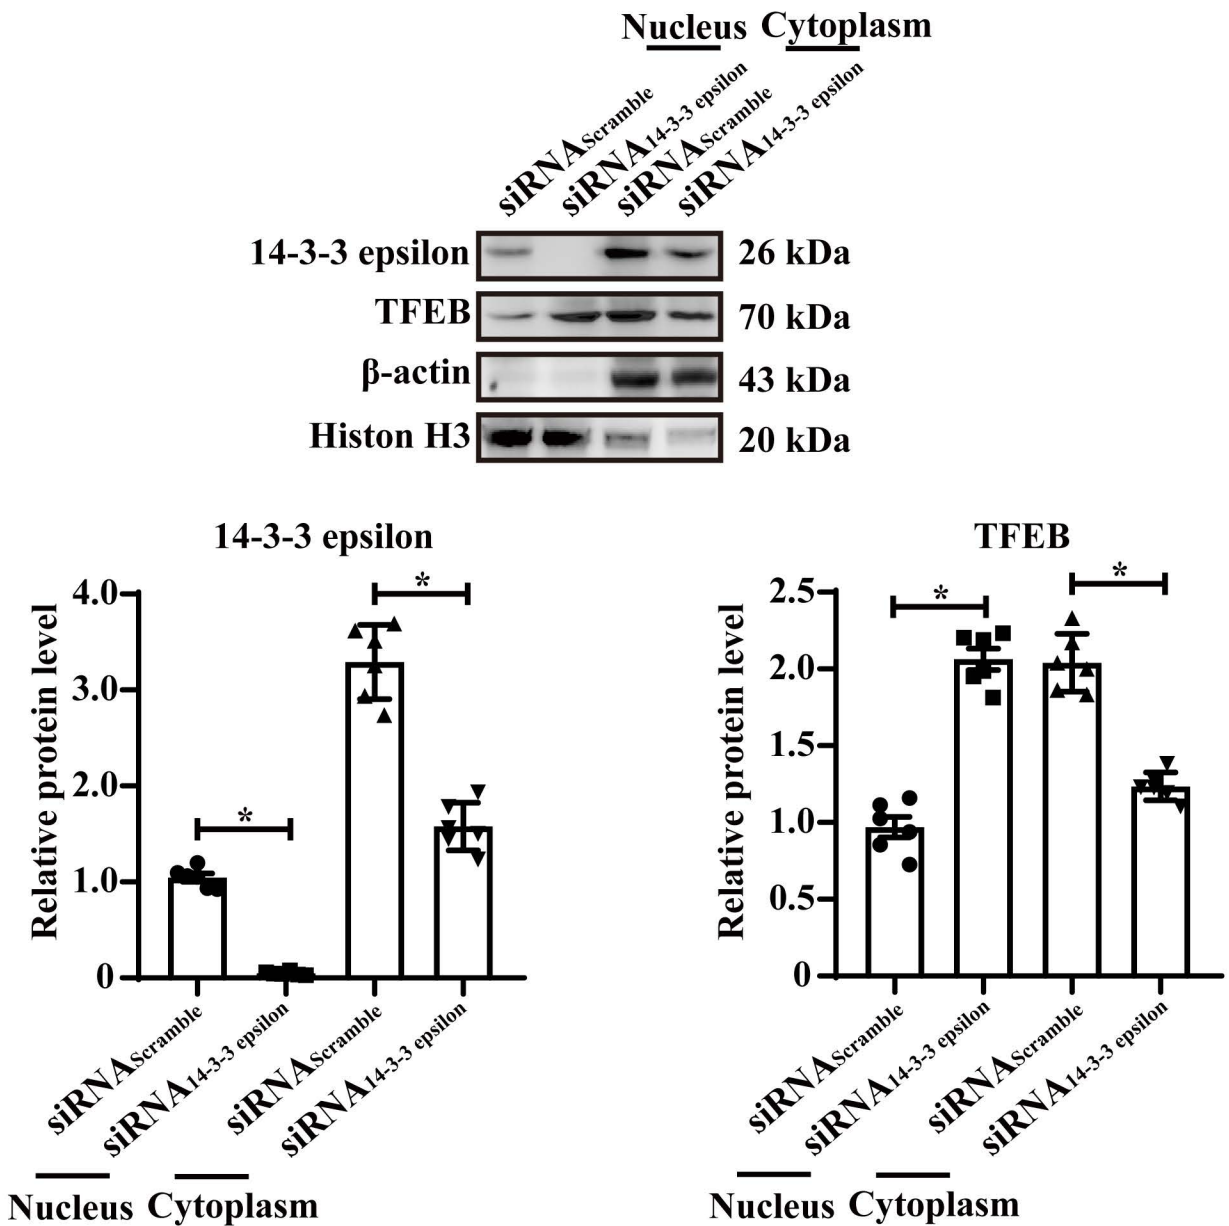

Supplementary Fig.S4



**f**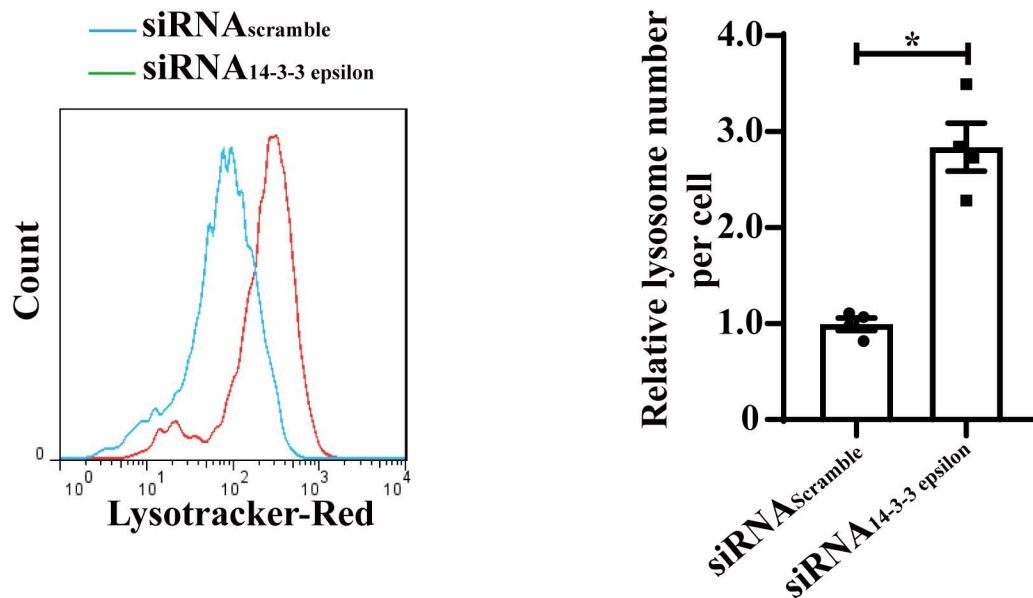**g**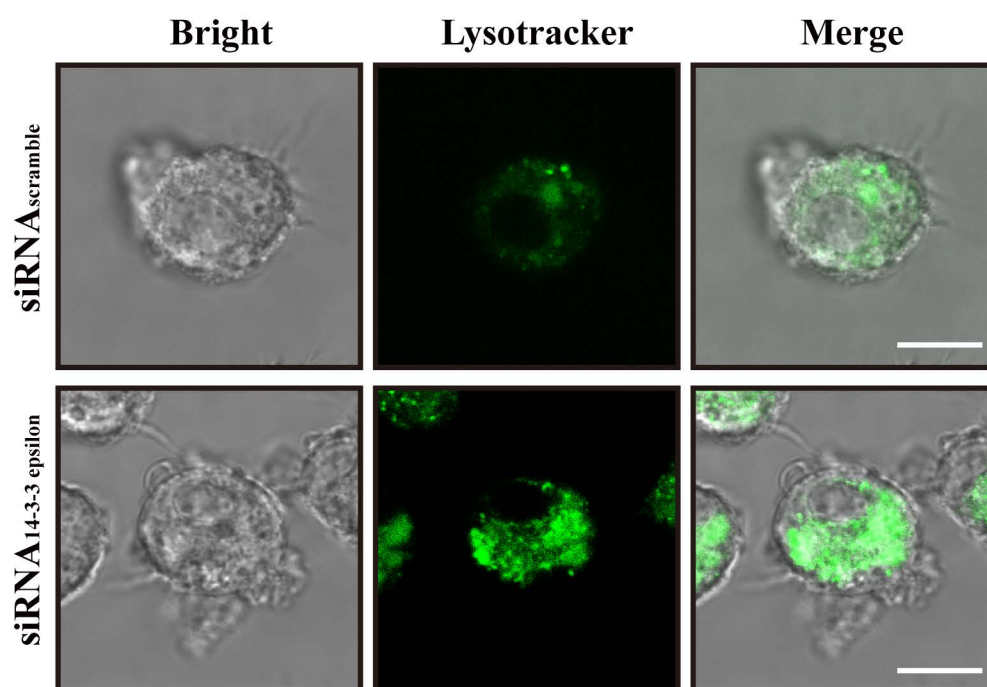**h**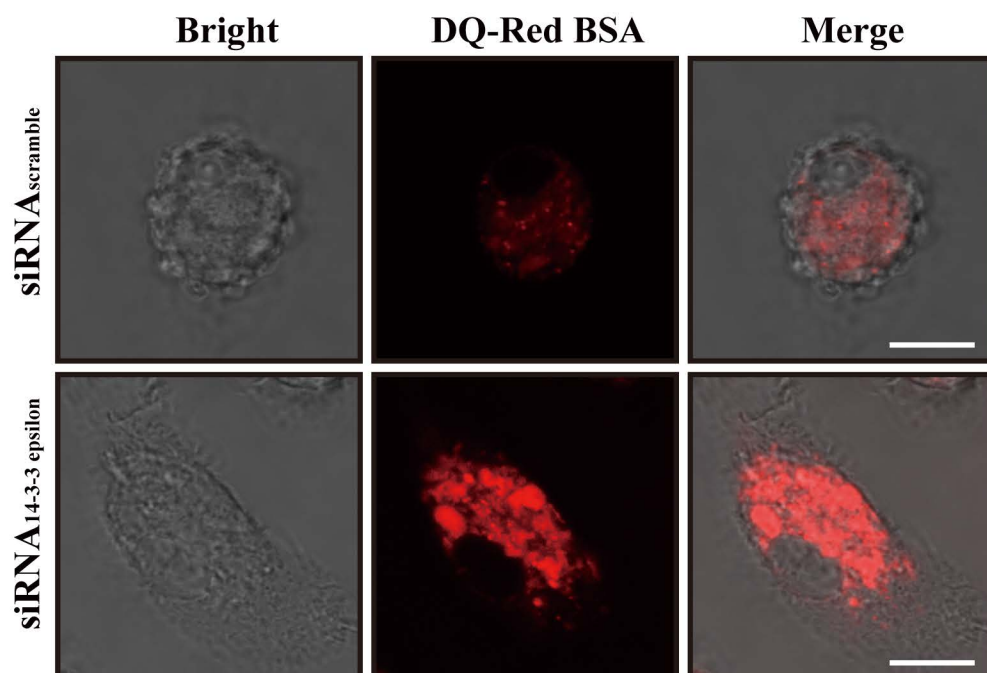

**a** **TFEB<sup>ff</sup> LysM Cre-** **TFEB<sup>ff</sup> LysM Cre+**

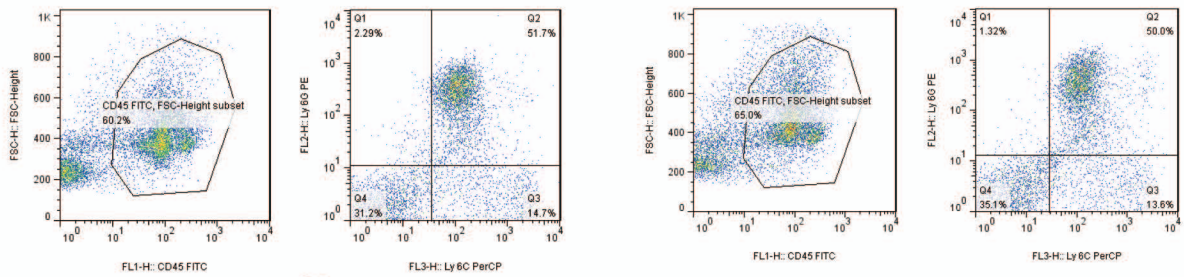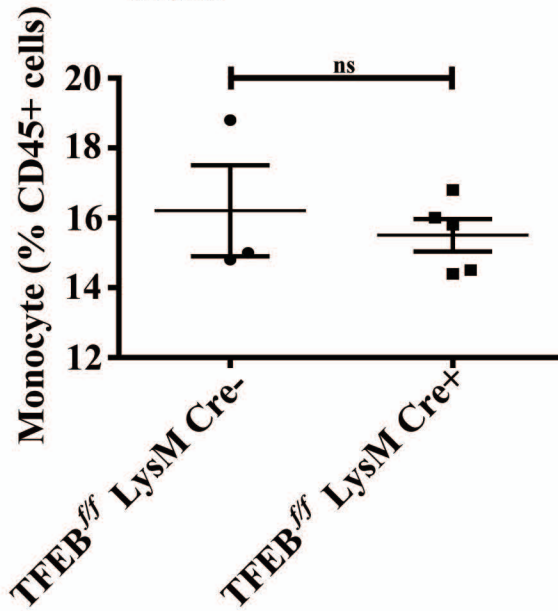

**b** **TFEB<sup>ff</sup> LysM Cre-** **TFEB<sup>ff</sup> LysM Cre+**

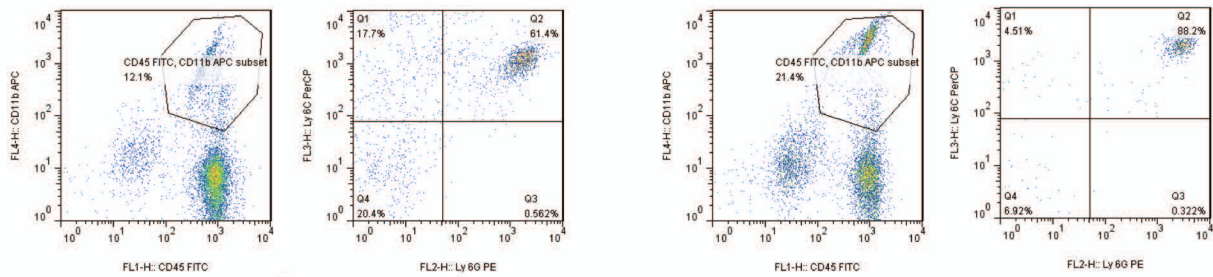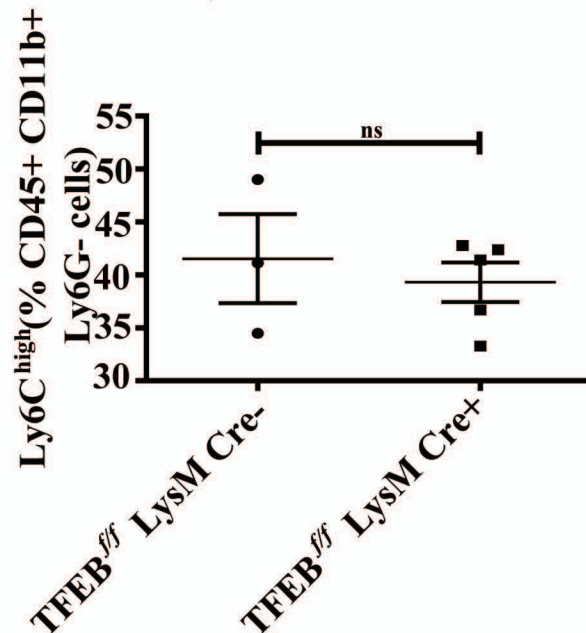

**c**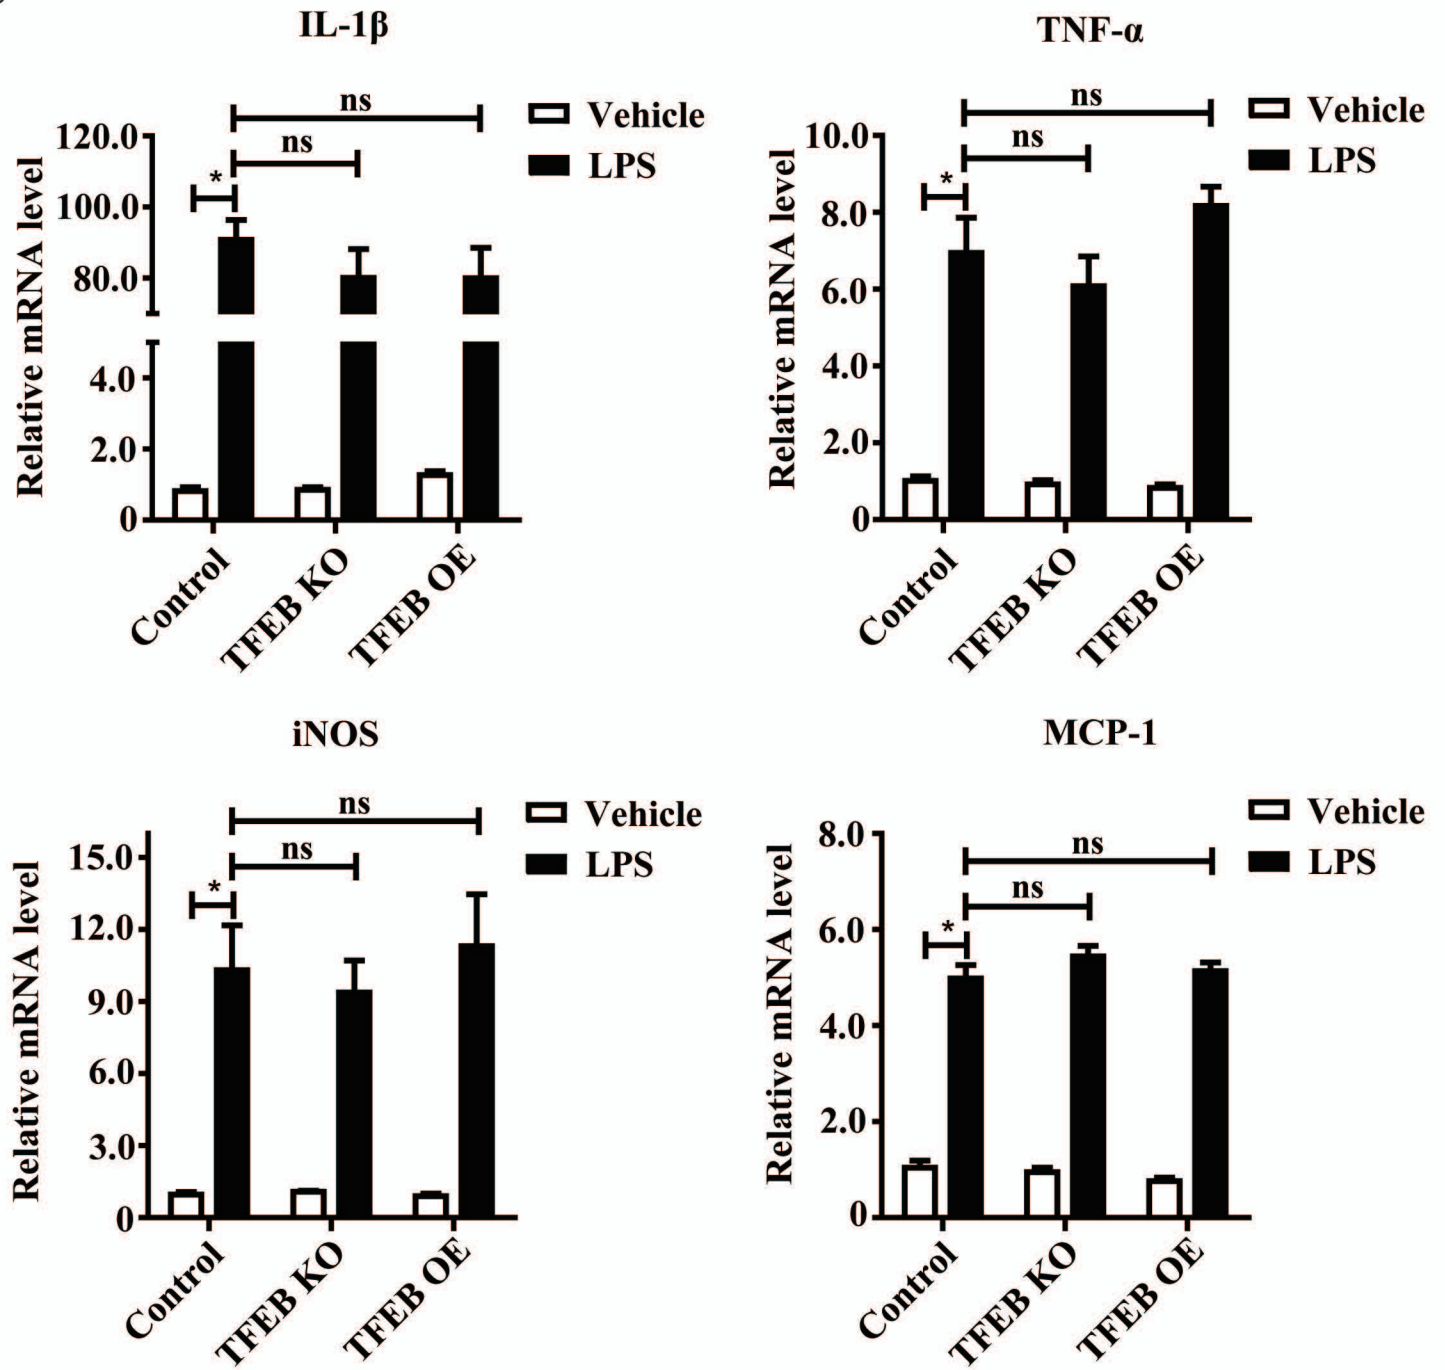

**d**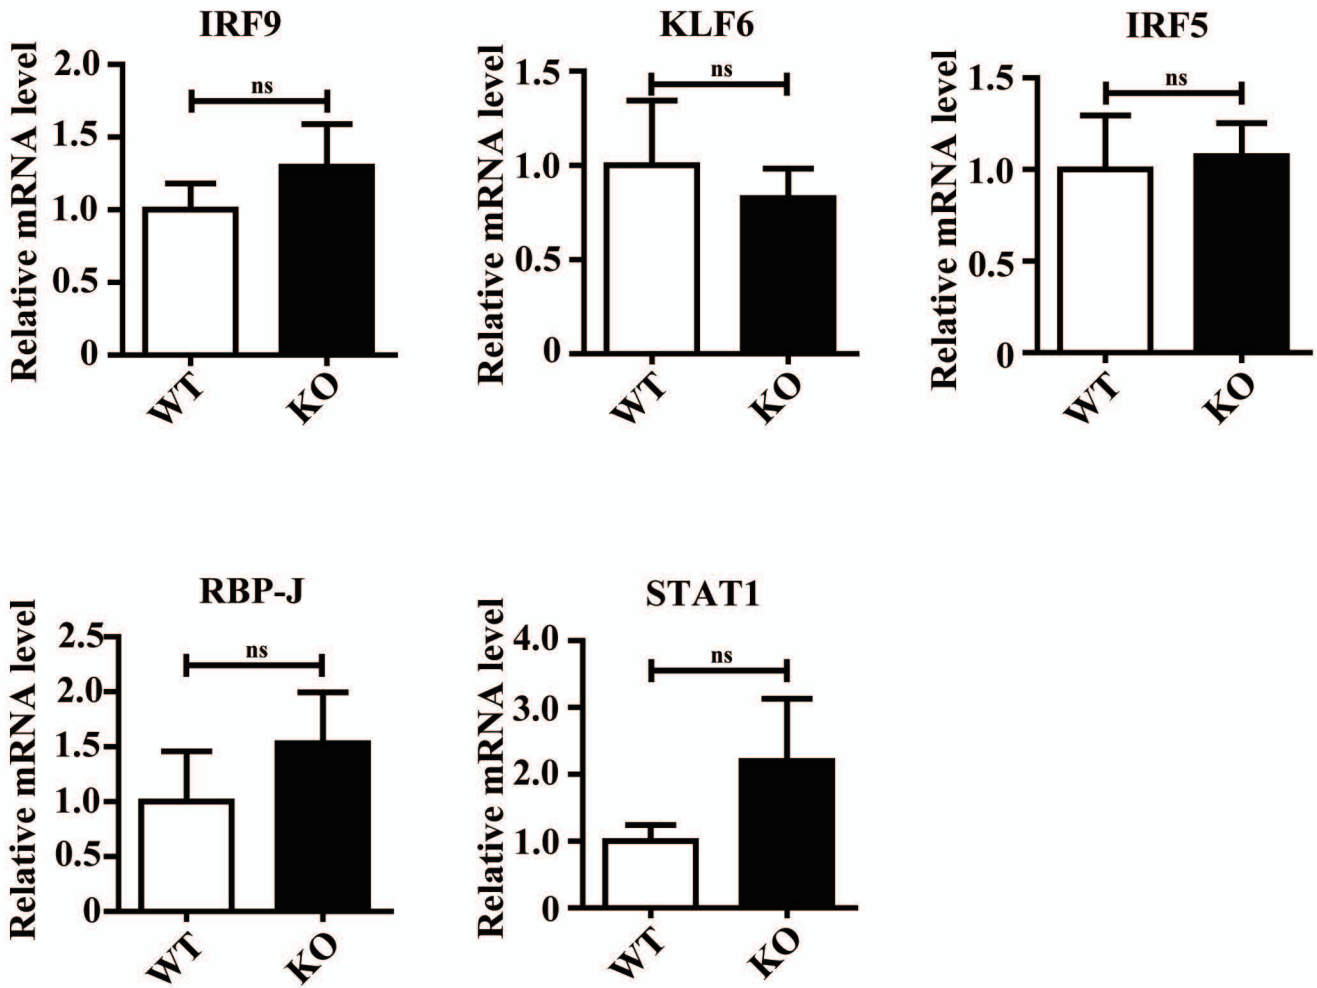**e**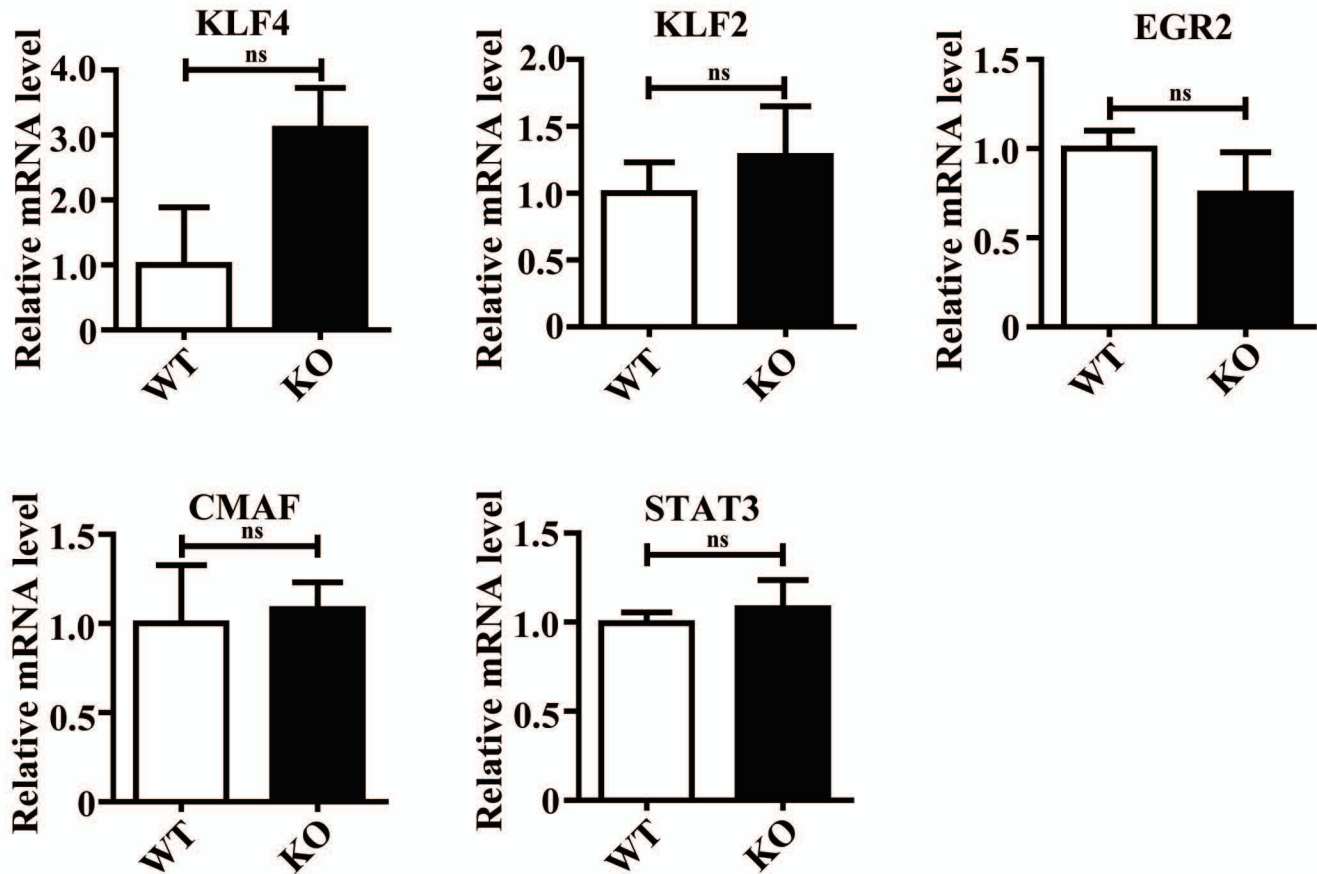

f

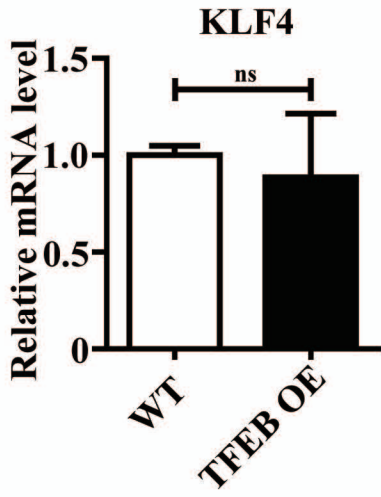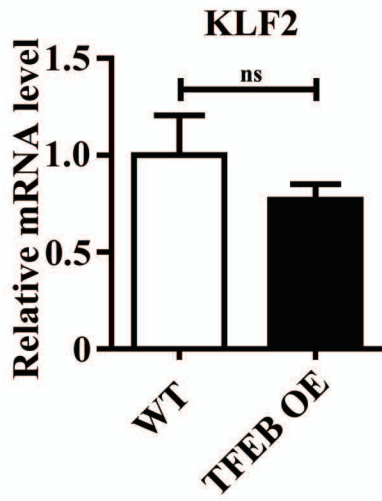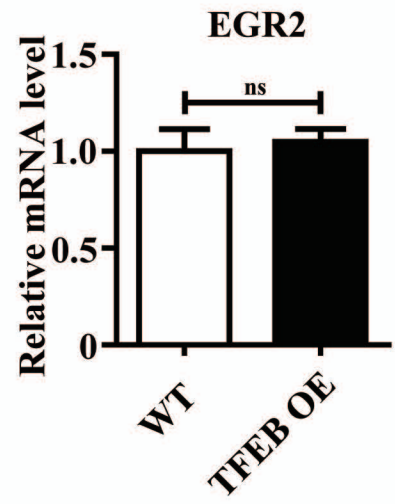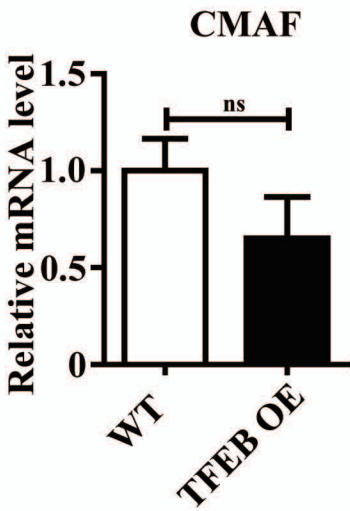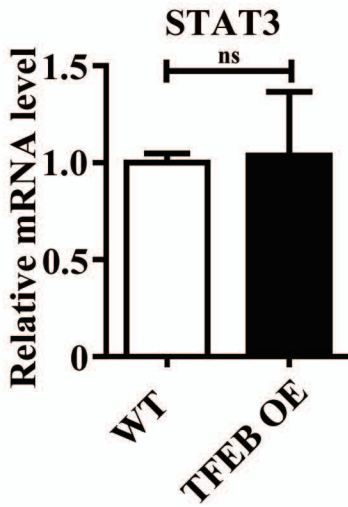

**Supplementary Table S1. List of drugs in the Connectivity Map and their correlation with doxycycline in drug-responsive expression profiles.**

| <b>Drug</b>                 | <b>correlation coefficient</b> | <b><i>P</i> -value</b> |
|-----------------------------|--------------------------------|------------------------|
| iopamidol                   | 0.323148                       | 0                      |
| sulfamonomethoxine          | 0.2944964                      | 0                      |
| DL-PPMP                     | 0.2875107                      | 0                      |
| ketotifen                   | 0.2575437                      | 0                      |
| podophyllotoxin             | 0.246211                       | 5.96E-305              |
| methyldopate                | 0.2448588                      | 1.57E-301              |
| streptomycin                | 0.2422756                      | 4.72E-295              |
| calcium folinate            | 0.2413125                      | 1.17E-292              |
| naringenin                  | 0.2363441                      | 1.80E-280              |
| zuclopenthixol              | 0.2361292                      | 5.96E-280              |
| tolnaftate                  | 0.2329646                      | 2.41E-272              |
| methoxamine                 | 0.2322435                      | 1.26E-270              |
| sulfadimethoxine            | 0.2304645                      | 2.04E-266              |
| dapsone                     | 0.2299272                      | 3.76E-265              |
| ambroxol                    | 0.2289667                      | 6.73E-263              |
| lisuride                    | 0.2288862                      | 1.04E-262              |
| SB-203580                   | 0.2287643                      | 2.00E-262              |
| fluticasone                 | 0.2278678                      | 2.47E-260              |
| Prestwick-691               | 0.2248227                      | 2.68E-253              |
| xamoterol                   | 0.2242593                      | 5.22E-252              |
| bumetanide                  | 0.2240391                      | 1.67E-251              |
| levopropoxyphene            | 0.2228707                      | 7.64E-249              |
| benzathine benzylpenicillin | 0.2224484                      | 6.93E-248              |
| betulinic acid              | 0.2207098                      | 5.82E-244              |
| bacampicillin               | 0.2197709                      | 7.40E-242              |
| pyrithyldione               | 0.2194513                      | 3.83E-241              |
| alprostadil                 | 0.2189723                      | 4.49E-240              |
| adiphenine                  | 0.2188048                      | 1.06E-239              |
| nadolol                     | 0.2182309                      | 2.00E-238              |
| 3-acetamidocoumarin         | 0.2155338                      | 1.76E-232              |
| yohimbic acid               | 0.2101305                      | 8.18E-221              |
| canadine                    | 0.2093337                      | 4.03E-219              |
| decamethonium bromide       | 0.2091902                      | 8.13E-219              |
| myricetin                   | 0.2087803                      | 5.99E-218              |
| terazosin                   | 0.2079325                      | 3.68E-216              |
| naproxen                    | 0.2063948                      | 6.17E-213              |
| genistein                   | 0.2045541                      | 4.12E-209              |
| benzocaine                  | 0.2026339                      | 3.68E-205              |
| zalcitabine                 | 0.2012554                      | 2.38E-202              |
| ceforanide                  | 0.2010863                      | 5.25E-202              |

|                     |           |           |
|---------------------|-----------|-----------|
| trimethobenzamide   | 0.2007786 | 2.21E-201 |
| tetracycline        | 0.1965853 | 5.58E-193 |
| folic acid          | 0.1964884 | 8.69E-193 |
| merbromin           | 0.1955401 | 6.48E-191 |
| ajmaline            | 0.1951418 | 3.94E-190 |
| Gly-His-Lys         | 0.1948474 | 1.49E-189 |
| diloxanide          | 0.1940869 | 4.59E-188 |
| viomycin            | 0.1936947 | 2.68E-187 |
| monensin            | 0.193324  | 1.41E-186 |
| heptaminol          | 0.1924032 | 8.64E-185 |
| bemegride           | 0.1920649 | 3.90E-184 |
| iohexol             | 0.1917371 | 1.67E-183 |
| pheniramine         | 0.1906388 | 2.16E-181 |
| clidinium bromide   | 0.1901039 | 2.28E-180 |
| cefaclor            | 0.1887332 | 9.28E-178 |
| amylocaine          | 0.1882577 | 7.38E-177 |
| khellin             | 0.1879266 | 3.11E-176 |
| CP-863187           | 0.1870222 | 1.57E-174 |
| Prestwick-1082      | 0.1868699 | 3.03E-174 |
| harpagoside         | 0.1867995 | 4.11E-174 |
| levomepromazine     | 0.1864793 | 1.64E-173 |
| clorsulon           | 0.1858873 | 2.09E-172 |
| tocainide           | 0.1856486 | 5.82E-172 |
| convolamine         | 0.1839191 | 9.35E-169 |
| timolol             | 0.1833588 | 1.01E-167 |
| finasteride         | 0.1830816 | 3.25E-167 |
| metronidazole       | 0.1826551 | 1.97E-166 |
| dicloxacillin       | 0.18253   | 3.33E-166 |
| diphenhydramine     | 0.1820917 | 2.11E-165 |
| baclofen            | 0.1817398 | 9.22E-165 |
| 12,13-EODE          | 0.1814188 | 3.54E-164 |
| streptozocin        | 0.1804488 | 2.03E-162 |
| dihydroergocristine | 0.179759  | 3.56E-161 |
| PHA-00745360        | 0.178741  | 2.39E-159 |
| lasalocid           | 0.1762641 | 5.98E-155 |
| arcaine             | 0.1762302 | 6.86E-155 |
| gentamicin          | 0.1759707 | 1.96E-154 |
| 5186324             | 0.1759531 | 2.11E-154 |
| stachydrine         | 0.1752102 | 4.25E-153 |
| gabexate            | 0.1740994 | 3.69E-151 |
| meteneprost         | 0.1735381 | 3.49E-150 |
| amantadine          | 0.1733328 | 7.91E-150 |
| dimenhydrinate      | 0.1732476 | 1.11E-149 |

|                        |           |           |
|------------------------|-----------|-----------|
| felbinac               | 0.1729467 | 3.68E-149 |
| neostigmine bromide    | 0.1722928 | 4.94E-148 |
| lansoprazole           | 0.1719626 | 1.82E-147 |
| thiopramide            | 0.1714351 | 1.46E-146 |
| maprotiline            | 0.1713642 | 1.93E-146 |
| Prestwick-692          | 0.171231  | 3.27E-146 |
| guanadrel              | 0.1711371 | 4.73E-146 |
| Prestwick-642          | 0.1706378 | 3.36E-145 |
| levobunolol            | 0.1704225 | 7.82E-145 |
| pentoxifylline         | 0.1700828 | 2.95E-144 |
| pivmecillinam          | 0.1695888 | 2.03E-143 |
| naftidrofuryl          | 0.1685557 | 1.12E-141 |
| metoprolol             | 0.1675024 | 6.53E-140 |
| fludrocortisone        | 0.1674554 | 7.83E-140 |
| isoflupredone          | 0.1667989 | 9.72E-139 |
| biperiden              | 0.164233  | 1.66E-134 |
| tyrphostin AG-1478     | 0.1603463 | 3.15E-128 |
| cloxacillin            | 0.1596394 | 4.21E-127 |
| furazolidone           | 0.1595606 | 5.61E-127 |
| BW-B70C                | 0.1593004 | 1.45E-126 |
| captopril              | 0.1589866 | 4.55E-126 |
| diazoxide              | 0.1588517 | 7.44E-126 |
| myosmine               | 0.1579789 | 1.76E-124 |
| diphenylpyraline       | 0.1574091 | 1.38E-123 |
| Prestwick-983          | 0.1571796 | 3.15E-123 |
| brinzolamide           | 0.1571332 | 3.72E-123 |
| homatropine            | 0.1569938 | 6.14E-123 |
| co-dergocrine mesilate | 0.156284  | 7.82E-122 |
| acebutolol             | 0.1562032 | 1.04E-121 |
| melatonin              | 0.1553946 | 1.86E-120 |
| cefamandole            | 0.154203  | 1.27E-118 |
| thiamphenicol          | 0.1533077 | 2.95E-117 |
| tranexamic acid        | 0.1529879 | 9.03E-117 |
| quinpirole             | 0.1528572 | 1.42E-116 |
| butamben               | 0.1516902 | 8.27E-115 |
| topiramate             | 0.1514835 | 1.69E-114 |
| sulmazole              | 0.1507069 | 2.47E-113 |
| lidocaine              | 0.1505691 | 3.97E-113 |
| ethionamide            | 0.1501076 | 1.94E-112 |
| pilocarpine            | 0.1498635 | 4.46E-112 |
| nizatidine             | 0.1496271 | 1.00E-111 |
| iopromide              | 0.1490071 | 8.30E-111 |
| carteolol              | 0.1487656 | 1.89E-110 |



|                       |           |           |
|-----------------------|-----------|-----------|
| meclofenamic acid     | 0.1485376 | 4.09E-110 |
| vigabatrin            | 0.1475688 | 1.08E-108 |
| cefoxitin             | 0.1471559 | 4.33E-108 |
| isoniazid             | 0.1465427 | 3.38E-107 |
| tiaprofenic acid      | 0.1459064 | 2.82E-106 |
| indoprofen            | 0.1449092 | 7.71E-105 |
| lovastatin            | 0.1441049 | 1.09E-103 |
| fursultiamine         | 0.1427542 | 9.04E-102 |
| cinchonine            | 0.142438  | 2.53E-101 |
| atractyloside         | 0.1423924 | 2.93E-101 |
| arecoline             | 0.1423631 | 3.22E-101 |
| etynodiol             | 0.1416024 | 3.78E-100 |
| metampicillin         | 0.1404852 | 1.37E-98  |
| chlortalidone         | 0.1400423 | 5.63E-98  |
| nimodipine            | 0.1399829 | 6.81E-98  |
| 5186223               | 0.1398496 | 1.04E-97  |
| minoxidil             | 0.1391999 | 8.21E-97  |
| vincamine             | 0.138998  | 1.56E-96  |
| ursolic acid          | 0.1383961 | 1.04E-95  |
| iloprost              | 0.1377991 | 6.80E-95  |
| benzbromarone         | 0.1369824 | 8.75E-94  |
| bambuterol            | 0.1368461 | 1.34E-93  |
| iopanoic acid         | 0.1357463 | 4.05E-92  |
| carbimazole           | 0.1356898 | 4.82E-92  |
| chenodeoxycholic acid | 0.1348766 | 5.89E-91  |
| clemastine            | 0.1346165 | 1.31E-90  |
| hydrochlorothiazide   | 0.134598  | 1.38E-90  |
| etiocholanolone       | 0.1338822 | 1.23E-89  |
| 5149715               | 0.1338565 | 1.33E-89  |
| chloropyrazine        | 0.1338172 | 1.50E-89  |
| clofazimine           | 0.1333376 | 6.44E-89  |
| quipazine             | 0.1327695 | 3.59E-88  |
| iodixanol             | 0.1326528 | 5.11E-88  |
| minocycline           | 0.1325871 | 6.23E-88  |
| tolazamide            | 0.1323408 | 1.31E-87  |
| acetoexamide          | 0.1303514 | 4.97E-85  |
| metolazone            | 0.130234  | 7.03E-85  |
| bretylium tosilate    | 0.1299527 | 1.62E-84  |
| dinoprost             | 0.1266034 | 2.80E-80  |
| demecarium bromide    | 0.1254907 | 6.75E-79  |
| CP-320650-01          | 0.1253507 | 1.01E-78  |
| estradiol             | 0.1252353 | 1.40E-78  |
| sodium phenylbutyrate | 0.1251596 | 1.73E-78  |

|                           |           |          |
|---------------------------|-----------|----------|
| isometheptene             | 0.1249611 | 3.04E-78 |
| Prestwick-967             | 0.1239228 | 5.71E-77 |
| spiradoline               | 0.1239096 | 5.93E-77 |
| cimetidine                | 0.1228958 | 1.01E-75 |
| cinchonidine              | 0.1228881 | 1.04E-75 |
| PNU-0293363               | 0.1227709 | 1.44E-75 |
| PF-00539745-00            | 0.1222466 | 6.16E-75 |
| vinblastine               | 0.12194   | 1.44E-74 |
| estropipate               | 0.120667  | 4.78E-73 |
| cromoglicic acid          | 0.1204181 | 9.44E-73 |
| cefotiam                  | 0.1197374 | 6.03E-72 |
| azacyclonol               | 0.1195646 | 9.63E-72 |
| ribavirin                 | 0.1194659 | 1.26E-71 |
| mimosine                  | 0.1185861 | 1.35E-70 |
| moroxydine                | 0.1182192 | 3.62E-70 |
| Prestwick-1103            | 0.117835  | 1.01E-69 |
| etilefrine                | 0.1158144 | 2.13E-67 |
| ikarugamycin              | 0.1156785 | 3.04E-67 |
| josamycin                 | 0.1150487 | 1.58E-66 |
| fendiline                 | 0.1143404 | 9.93E-66 |
| 2-aminobenzenesulfonamide | 0.112282  | 1.96E-63 |

**Supplementary Table S2. Variables of Calcium Phosphate Treated C57BL/6J Mice After Naringenin or Doxycycline Treatment.**

| <b>Group</b> | <b>NaCl</b> | <b>CaPO<sub>4</sub></b> | <b>CaPO<sub>4</sub> + NGN</b> | <b>CaPO<sub>4</sub> + Dox</b> |
|--------------|-------------|-------------------------|-------------------------------|-------------------------------|
| N            | 11          | 12                      | 11                            | 11                            |
| Weight (g)   | 21.1±1.92   | 20.3±1.98               | 20.1±1.41                     | 21.0±1.89                     |
| TC (mM)      | 3.09±0.37   | 3.73±0.93               | 3.53±0.45                     | 3.49±0.64                     |
| TG (mM)      | 1.22±0.32   | 1.22±0.39               | 0.97±0.22                     | 1.07±0.32                     |
| BP (mmHG)    | 110.7±4.90  | 117.9±7.53              | 120.5±4.43                    | 114.4±4.07                    |

**TC, total cholesterol; TG, triglycerides; BP, blood pressure.**

**Data are means ± SEM.**

**Supplementary Table S3. Variables of AngII infused ApoE<sup>-/-</sup> Mice After Naringenin Treatment.**

| <b>Group</b> | <b>AngII</b> | <b>AngII + NGN</b> |
|--------------|--------------|--------------------|
| N            | 12           | 12                 |
| Weight (g)   | 28.8±1.42    | 28.9±2.03          |
| TC (mM)      | 12.3±1.36    | 8.46±2.45 *        |
| TG (mM)      | 1.66±0.62    | 0.69±0.35 *        |
| LDL (mM)     | 2.08±1.19    | 1.03±0.53 *        |
| HDL (mM)     | 1.43±0.14    | 1.46±0.15          |
| BP (mmHG)    | 131.0±16.2   | 136.6±14.27        |

**TC, total cholesterol; TG, triglycerides; BP, blood pressure; LDL, low density lipoprotein; HDL, high density lipoprotein.**

**Data are means ± SEM.**

**Supplementary Table S4. Variables of AngII infused ApoE<sup>-/-</sup> Mice Followed by Naringenin Treatment.**

| Group      | AngII 28 day |             | AngII 56 day (with AAA) |             |
|------------|--------------|-------------|-------------------------|-------------|
|            | Before       | After       | Vehicle gavage          | NGN gavage  |
| N          | 70           | 70          | 17                      | 21          |
| Weight (g) | 27.8±1.11    | 27.5±1.78   | 29.4±1.56               | 29.7±0.67   |
| TC (mM)    | 10.5±1.22    | 11.3±3.87   | 12.6±1.55               | 9.67±1.33 * |
| TG (mM)    | 1.98±0.55    | 2.33±0.38   | 2.39±0.51               | 1.22±0.47 * |
| LDL (mM)   | 1.87±0.98    | 1.95±0.33   | 2.06±0.58               | 1.44±0.38*  |
| HDL (mM)   | 1.88±0.17    | 1.97±0.28   | 1.95±0.1                | 1.84±0.19   |
| BP (mmHG)  | 149.6±8.97   | 144.2±10.16 | 150.4±5.23              | 158.45±4.24 |

**TC, total cholesterol; TG, triglycerides; BP, blood pressure; LDL, low density lipoprotein; HDL, high density lipoprotein.**

**Data are means ± SEM.**

**Supplementary Table S5. Variables of sham operated or CaPO4-induced TFEB<sup>flox/flox</sup> Mice or TFEB<sup>Mφko</sup> mice with vehicle or naringenin gavage.**

| Group      | Sham                      |                      | CaPO4                     |                      |                                 |                            |
|------------|---------------------------|----------------------|---------------------------|----------------------|---------------------------------|----------------------------|
|            | TFEB <sup>flox/flox</sup> | TFEB <sup>Mφko</sup> | TFEB <sup>flox/flox</sup> | TFEB <sup>Mφko</sup> | TFEB <sup>flox/flox</sup> + NGN | TFEB <sup>Mφko</sup> + NGN |
| N          | 6                         | 6                    | 6                         | 6                    | 13                              | 14                         |
| Weight (g) | 22.6±2.15                 | 24.3±2.43            | 24.6±2.22                 | 25.1±1.23            | 24.8±0.62                       | 22.9±2.11                  |
| TC (mM)    | 10.6±1.05                 | 12.0±1.22            | 10.3±1.16                 | 11.8±0.96            | 10.3±0.46                       | 11.7±2.25                  |
| TG (mM)    | 1.33±0.55                 | 1.44±0.20            | 1.45±0.72                 | 1.36±0.14            | 1.55±0.22                       | 1.69±0.45                  |
| BP (mmHG)  | 115.6±13.05               | 118.8±8.25           | 122.6±10.53               | 114.5±7.43           | 124.6±9.75                      | 118.0±6.45                 |

**TC, total cholesterol; TG, triglycerides; BP, blood pressure  
Data are means ± SEM.**

**Supplementary Table S6. Variables of CaPO4-induced AAA in AAV2-GFP and AAV2-TFEB infected wild type Mice.**

| <b>Group</b> | <b>AAV2-GFP</b> | <b>AAV2-TFEB</b> |
|--------------|-----------------|------------------|
| N            | 9               | 9                |
| Weight (g)   | 23.1±1.48       | 24.5±2.43        |
| TC (mM)      | 11.4±2.06       | 12.3±3.22        |
| TG (mM)      | 1.66±0.32       | 1.45±0.41        |
| BP (mmHG)    | 114.2±13.54     | 108.3±13.3       |

**TC, total cholesterol; TG, triglycerides; BP, blood pressure  
Data are means ± SEM.**

**Supplementary Table S7. The Top 10 Putative NGN-binding Proteins in Macrophage.**

| <b>Uniprot ID</b> | <b>Gene name</b>                  | <b>Miss-digested peptide number</b> |
|-------------------|-----------------------------------|-------------------------------------|
| Q61207            | Prosaposin                        | 15                                  |
| P97429            | Annexin A4                        | 10                                  |
| P28798            | Granulins                         | 7                                   |
| P48036            | Annexin A5                        | 7                                   |
| Q62192            | CD180 antigen                     | 7                                   |
| O09131            | Glutathione S-transferase omega-1 | 5                                   |
| Q62426            | Cystatin-B                        | 4                                   |
| P14211            | Calreticulin                      | 3                                   |
| P62259            | 14-3-3 protein epsilon            | 1                                   |
| P11438            | LAMP1                             | 1                                   |



**Supplementary Table S8. Primers used for RT-qPCR.**

| <b>Primer Name</b> | <b>Forward (5'-3')</b> | <b>Reverse (5'-3')</b> |
|--------------------|------------------------|------------------------|
| Tcf7l1             | AGATGCAGATGCCTAACACG   | CATTCCCAGCTCCTTGATCC   |
| TFE3               | AGTGGCTACCCCAGCTATCA   | CGCCTGCGTCGTTCAATTAG   |
| MiTF               | CCCTCTCACCTGTTGGAGTC   | TCCGTTTCTTCTGCGCTCAT   |
| ATP6V1A            | CCACGTAACAGAGGAAGCGT   | AAGGGCATCGAGGACTCTCT   |
| ATP6V1D            | CGCAAGTGAAGATTCGAGCG   | GGCATTACACGCCTGTTGG    |
| MMP-2              | CAAGTTCCCCGGCGATGTC    | TTCTGGTCAAGGTCACCTGTC  |
| MMP-9              | CTGGACAGCCAGACACTAAA   | CTCGCGGCAAGTCTTCAGAG   |
| 18 S               | ATTGGAGCTGGAATTACCGC   | CGGCTACCACATCCAAGGAA   |
| MMP-3              | ACATGGAGACTTTGTCCCTTT  | TTGGCTGAGTGGTAGAGTCCC  |
| MMP-12             | CTGCTCCCATGAATGACAGTG  | AGTTGCTTCTAGCCCAAAGAAC |
| IRF5               | GGGGACAACACCATCTTCAA   | CGTTGGAGCAGACCTCGTAGA  |
| IRF3               | ACGGCAGGACGACACGAT     | TCAGCAGCTAACCGCAACAC   |
| STAT1              | TGCCTATGATGTCTCGTTTGC  | ATCTGTACGGGATCTTCTTGGA |
| RBP-J              | ACTCGAGGCGTCTGCTTAAC   | AGCACTGTTTGATCCCCTCG   |
| KLF6               | GGACCAAATTCATTCTAGCTC  | AGGCGTCGCCATTACCCTTG   |
| IRF9               | TGCTTCCTCCAGAGCCAGAC   | CACAAGGCGGCAATCCAG     |
| STAT6              | GCTGGACAGACCTACAGACC   | GGCGTTGTGGAAAGTCAACATA |
| STAT3              | GTACAAAGGCACTCCATCAG   | CCCCATATCGTCTGAAACTCC  |
| KLF4               | CTGAACAGCAGGGACTGTCA   | GTGTGGGTGGCTGTTCTTTT   |
| KLF2               | CGCCTCGGGTTCATTTT      | AGCCTATCTTGCCGTCCTTT   |
| ERG2               | CGGATCACAGGCAGGAGAGA   | GAGGTGGAAGTGGTGGATGG   |
| CMAF               | GCCACCTTGTTAAATGCTCCG  | GGCAATCCATGAGCCAGACA   |
| GATA3              | AGCTGTCTGCGAACACTGAG   | GCTCAGAGACGGTTGCTCTT   |
| IRF4               | AGGTGACTCTGTGCTTTGGTG  | GGGAGCGGTGGTAATCTGG    |
| TSC2               | CGGGTGAAGAGAGCCGTATC   | TTTCCCCTTCGTGATGGAGC   |
| LAMP1              | GATGCCCTAGTGCCACATT    | TGGACCTGCACACTGAAGAC   |
| NPC1               | TACGAGTTTGCTCCACGGTC   | TCTGGAGCCTCTCTGTGTCA   |
| NPC2               | CAAGGACTGCGGCTCTAAGG   | GACTGAGTGCCGCTGGTAAA   |
| CTSB               | CAGGCTGGACGCAACTTCTA   | CCAAATGCCCAACAAGAGCC   |

Supplementary Table S9. Primers used for Chip-PCR.

| Primer Name             | Sequence (5'-3')       |
|-------------------------|------------------------|
| chip-stat6-ATCACGGGAC-F | CAAGGGACTCCCGGAGAC     |
| chip-stat6-GTCATGTGTG-F | CAGAGGCTGAACAAGGGG     |
| chip-stat6-ACCACATGGT-F | TGGAGAGATGGCTCAGATG    |
| chip-stat6-CCCACATGGT-F | GGACTGGAGAGAGAGCTCAGTG |
| chip-stat6-ATCACGGGAC-R | AAAACAGCTGGGAGCCCGA    |
| chip-stat6-GTCATGTGTG-R | CACGCATACACACACACATAC  |
| chip-stat6-ACCACATGGT-R | TGAGTACACTGTCACTGTCTT  |
| chip-stat6-CCCACATGGT-R | GTGCTCTCAGAGGCTAGAGG   |
| chip-IRF4-GTCACATGCT-F  | TAAACGCTCAGAGAGACAAG   |
| chip-IRF4-GTCACATGCT-R  | AACTACTAACTGCTCATGGC   |
| chip-IRF4-GGCACAAGGC-F  | TTTGTCTGAAGTGGGACAGCC  |
| chip-IRF4-GGCACAAGGC-R  | TGCAGGGCGGGCGCTTCGGCCC |
| chip-IRF4-CCCACGAGGC-F  | TAAAGTAAAACCTTCAG      |
| chip-IRF4-CCCACGAGGC-R  | ATCCCTGAGTACTCAGGTAGT  |
| chip-IRF4-AACATGTGAA-F  | GTGGCCAAAATCAGATGT     |
| chip-IRF4-AACATGTGAA-R  | TGTATCATTTTAGATTACC    |
| chip-IRF4-GACACGTGTG-F  | AAACTTCTGAAAACAGAG     |
| chip-IRF4-GACACGTGTG-R  | AGGACAGAAGCAGCCAACCC   |
| chip-IRF4-ACCATGTGAA-F  | CAACGAGCGAGCGAGTA      |
| chip-IRF4-ACCATGTGAA-R  | CCTCAGCCAATCTACATCC    |
| chip-IRF4-CTCACATGTT-F  | CTCAATATGTCGTGTG       |
| chip-IRF4-CTCACATGTT-R  | TGTCGCCATTTCTTACCA     |
| chip-GATA3-CACACCTGAC-F | TGGAGCCTAGGCTGGTCT     |
| chip-GATA3-CACACCTGAC-R | CCGAGACAGCAGAGCTG      |
| chip-GATA3-AACTCCTGAC-F | TAATGGGGTCTCACA        |
| chip-GATA3-AACTCCTGAC-R | TGTAGCCTTTGAAATGGTTT   |
| chip-GATA3-GCCAGGTGCT-F | TCCTCAGCTGAGGTTTCCAG   |
| chip-GATA3-GCCAGGTGCT-R | ATGAATATCCAGCCGGCTTC   |

**Supplementary Table S10. Primers used for subcloning of pGL3-GATA3/IRF4/STAT6-luc plasmids.**

| <b>Primer Name</b> | <b>Sequence (5'-3')</b>                                   |
|--------------------|-----------------------------------------------------------|
| vectorF            | TAGAGGGTATATAATGGAAGCTCGAATTCCAGCTCGAGATCTG<br>CGATCTAAGT |
| vectorRSTAT6       | ACTGAGCTCTCTCTCCAGTCCTATCGATAGAGAAAT                      |
| vectorRIRF4        | ACACCACACGACATATTGAGTATCGATAGAGAAAT                       |
| vectorRGATA3       | CAGAACACACAGGGGCTAACTATCGATAGAGAAAT                       |
| promoter STAT6F    | ATTTCTCTATCGATAGGACTGGAGAGAGAGCTCAGT                      |
| promoter STAT6R    | CTTCCATTATATAACCCTCTACACGCACTCGTCTCCGGG                   |
| promoter IRF4F     | ATTTCTCTATCGATACTCAATATGTCGTGTGGTGT                       |
| promoter IRF4R     | CTTCCATTATATAACCCTCTACCTCACACTCCTCCTTCTGC                 |
| promoter GATA3F    | ATTTCTCTATCGATAGTTAGCCCCTGTGTGTTCTG                       |
| promoter GATA3R    | CTTCCATTATATAACCCTCTAGGGAGCAGAATGTCACTCT                  |
